# Supplementary material
Source: PubMed Central journal article supplement (PMC2630076)

# **Supporting figure S1 for “Allelic recombination between distinct genomic locations generates copy number diversity in human beta-defensins ” by Suhaili Abu Bakar *et al.***

**(28 pages)**

## **Page      Contents**

1            This contents page

Supporting Figure S1:

2            Key to Supporting Figure S1, showing data from members of CEPH family 1350 as an example

3-28        Complete CEPH family data, families 02-13294

# Key to Supporting Figure S1 CEPH family data (showing members of family 1350)

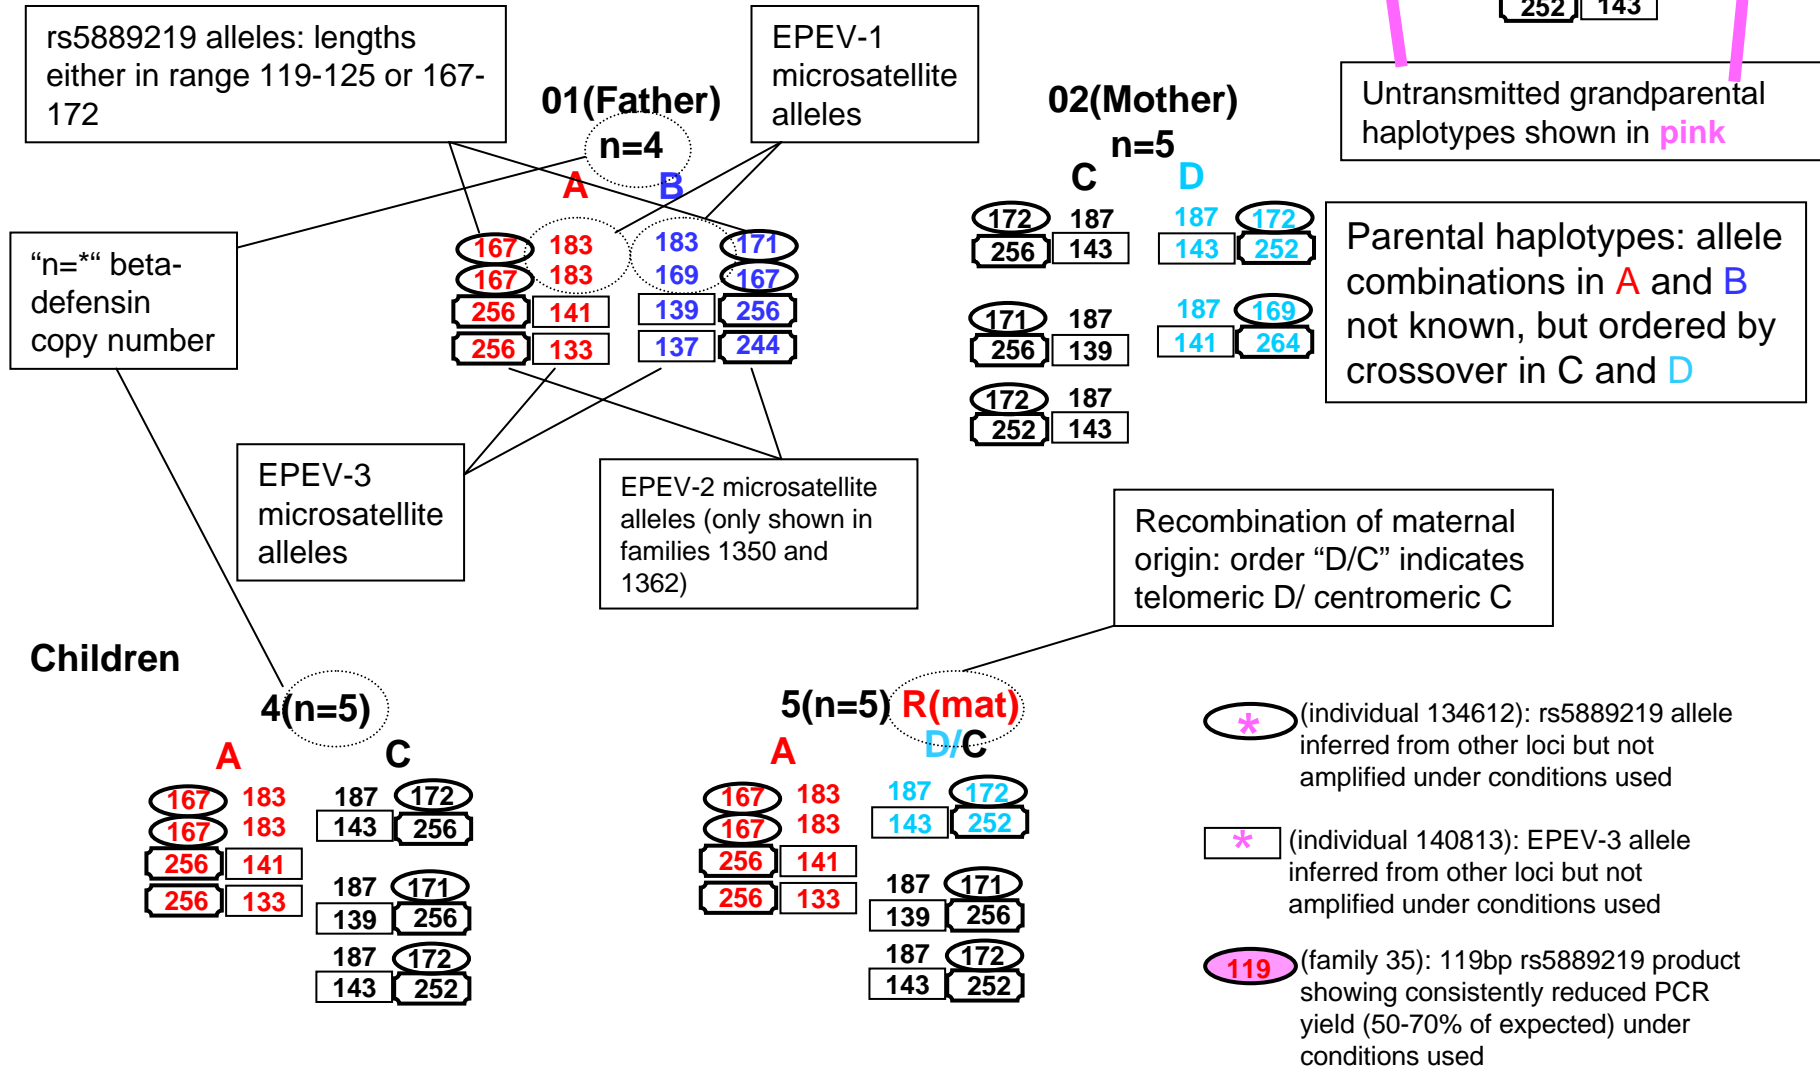

# CEPH Family 2

01(Father)  
n=4

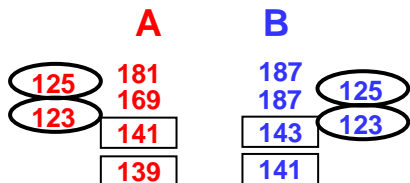

02(Mother)  
n=4

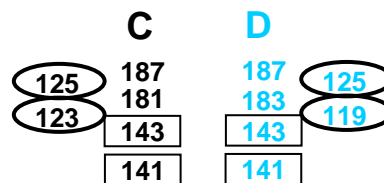

## Children

3(n=4)

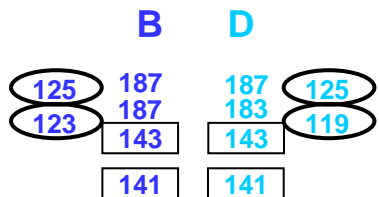

4(n=4)

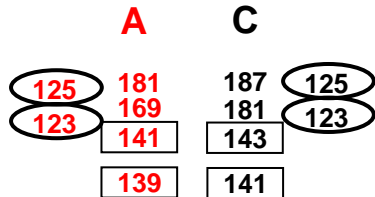

5(n=4)

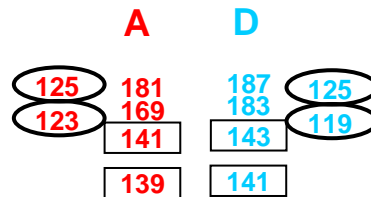

6(n=4)

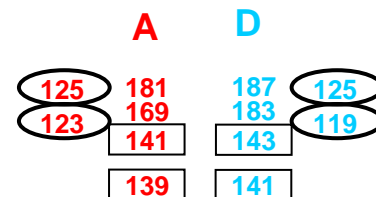

7(n=4)

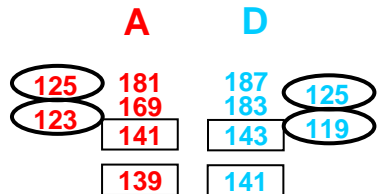

8(n=4)

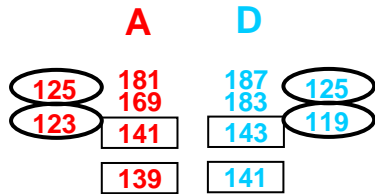

9(n=4)

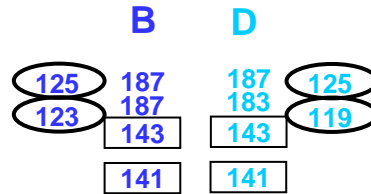

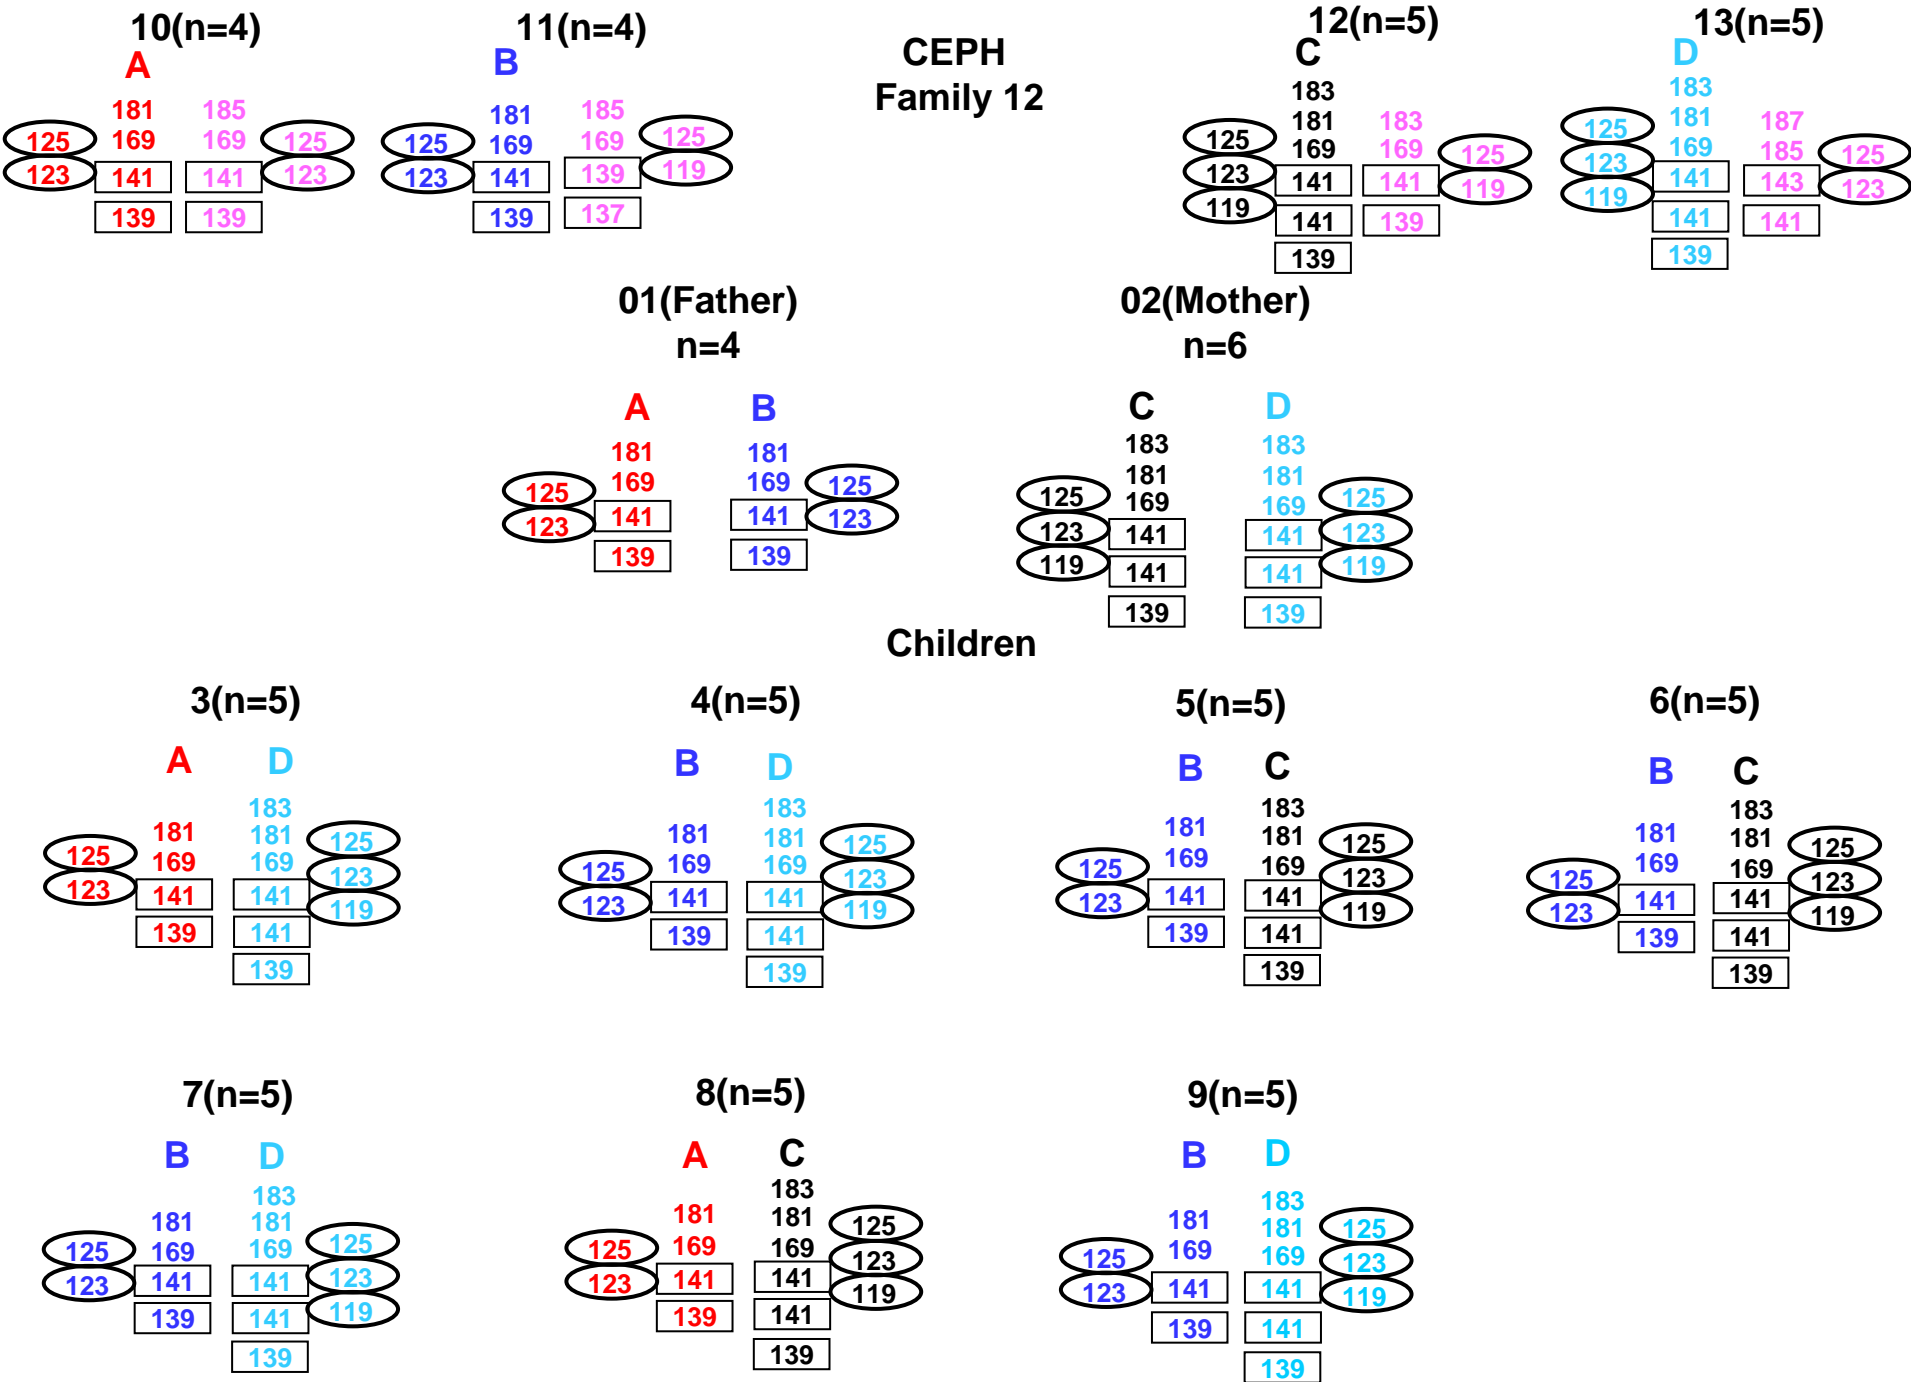

# CEPH Family 23

**01(Father)**  
n=5

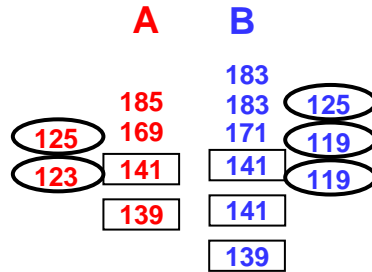

**02(Mother)**  
n=2

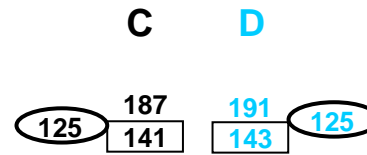

## Children

**3(n=4)**

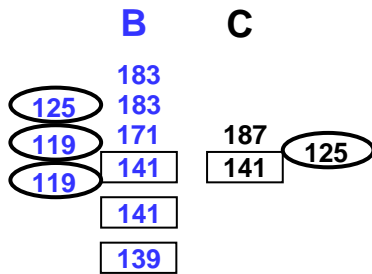

**4(n=4)**

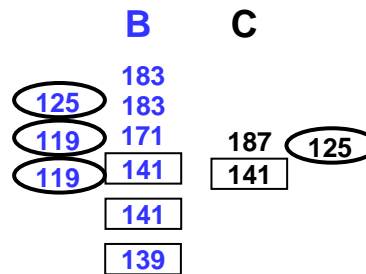

**5(n=3)**

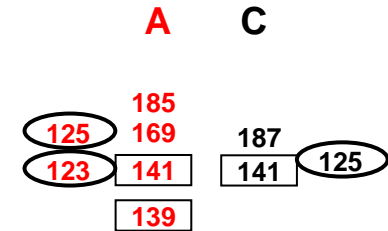

**6(n=3)**

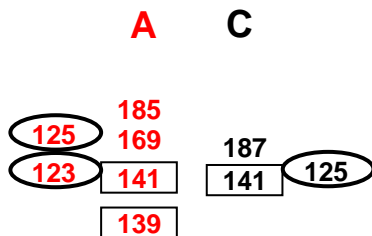

**7(n=4)**

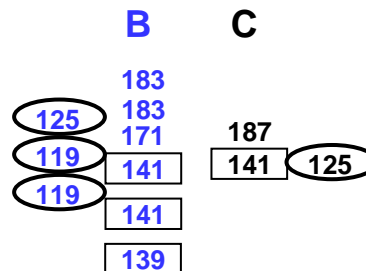

**8(n=4)**

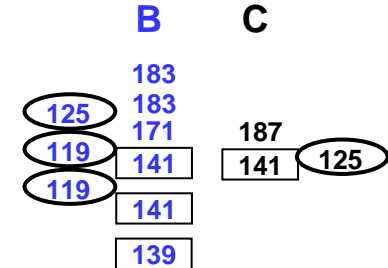

# CEPH Family 35

01(Father)

n=5

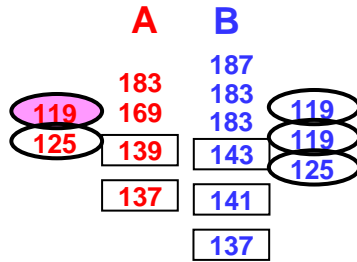

01(Mother)

n=4

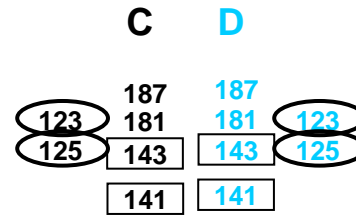

## Children

3(n=5)

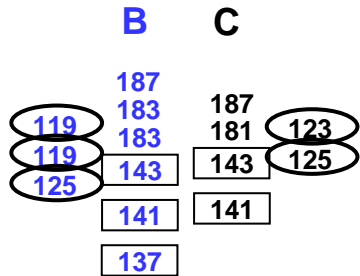

4(n=5)

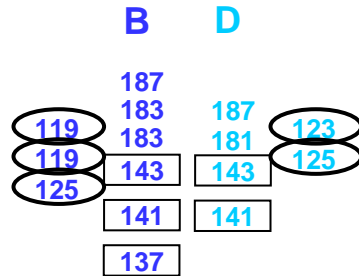

5(n=5)

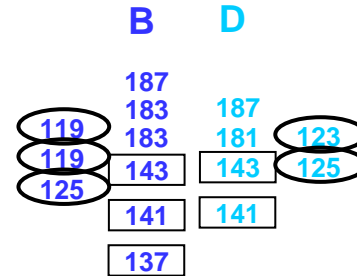

6(n=4)

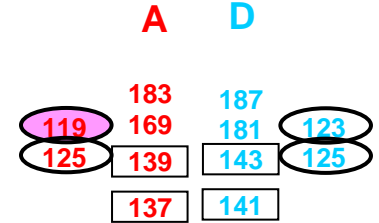

7(n=5)

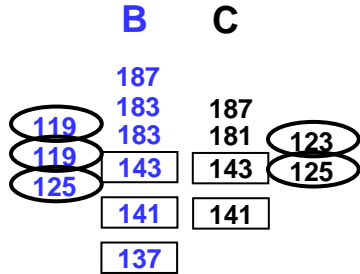

8(n=4)

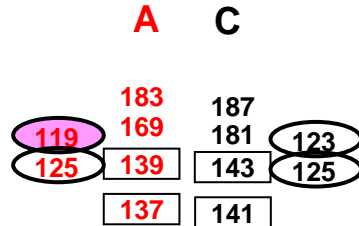

9(n=5)

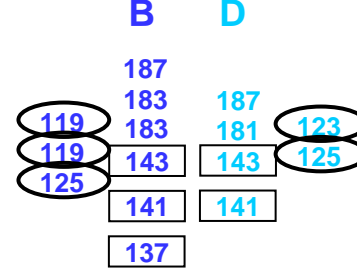

10(n=4)

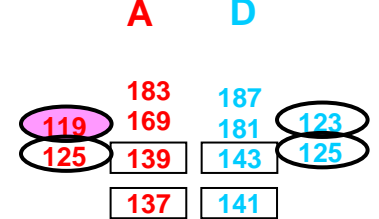

# CEPH Family 37

01(Father)  
n=5

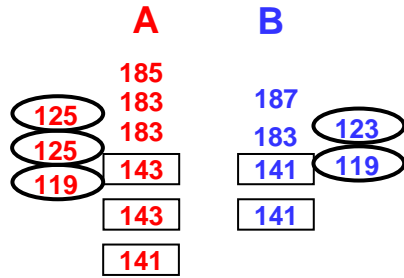

02(Mother)  
n=5

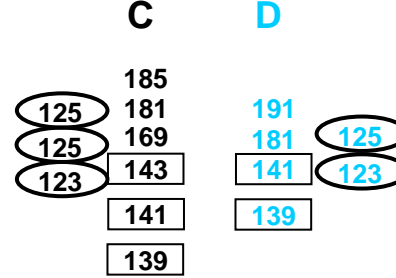

## Children

4(n=5)

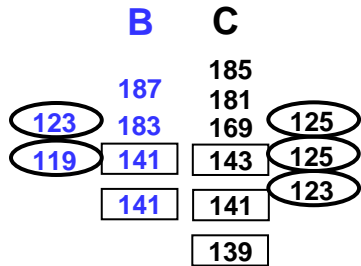

5(n=5)

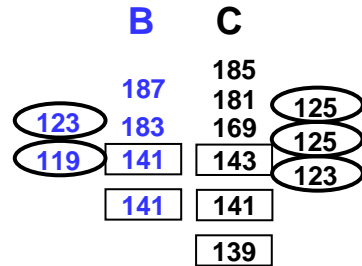

6(n=5)

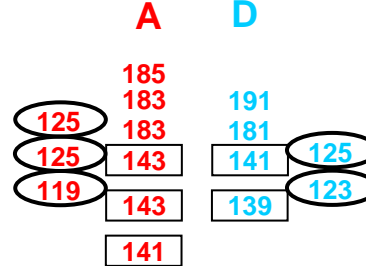

8(n=5)

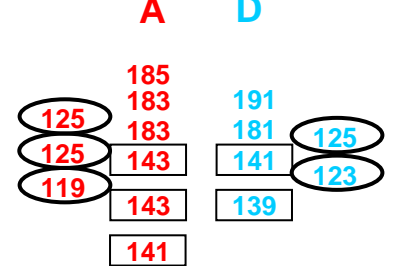

# CEPH Family 45

01(Father)  
n=3

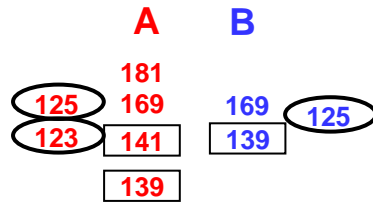

02(Mother)  
n=5

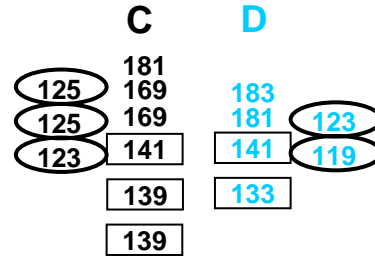

## Children

3(n=4)

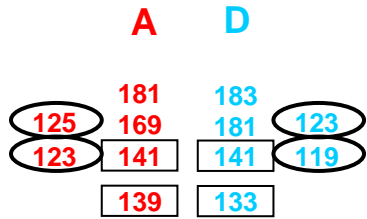

4(n=5)

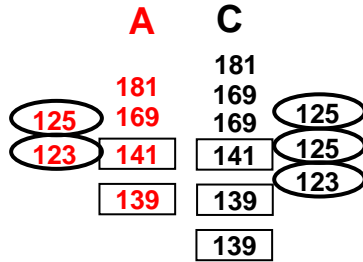

5(n=4)

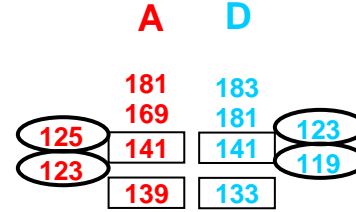

6(n=3)

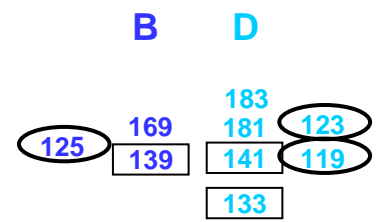

7(n=4)

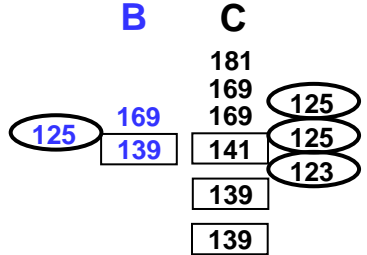

8(n=4)

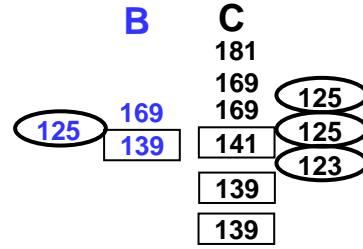

9(n=5)

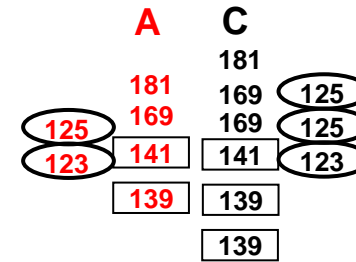

10(n=3)

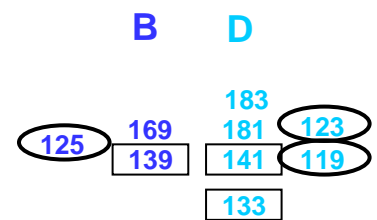



10(n=5)

A

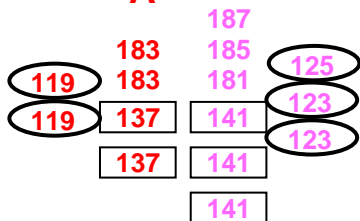

11(n=5)

B

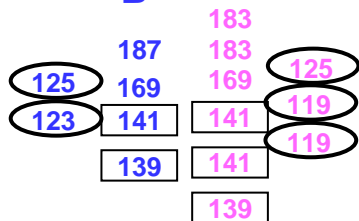

CEPH  
Family 66

12(n=5)

C

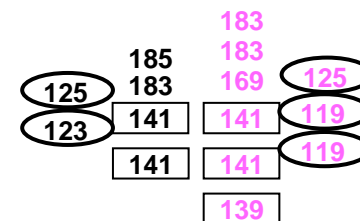

01(Father)

n=4

A

B

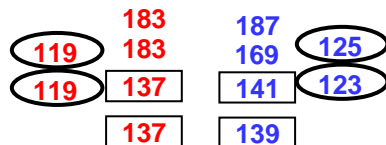

02(Mother)

n=4

C

D

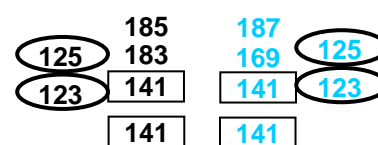

Children

4(n=4)

B

D

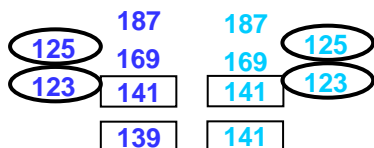

5(n=4)

B

D

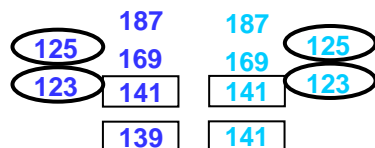

6(n=4)

B

D

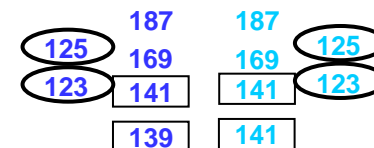

7(n=4)

A

D

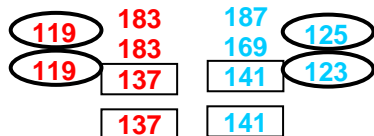

8(n=4)

A

C

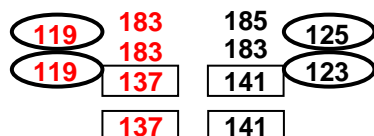

9(n=4)

A

C

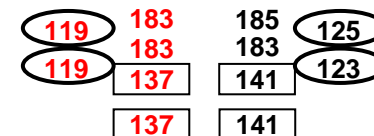

01(Father)

n=6

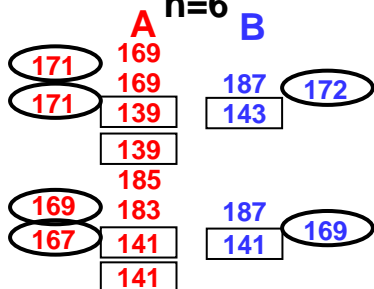

CEPH  
Family 102

02(Mother)

n=3

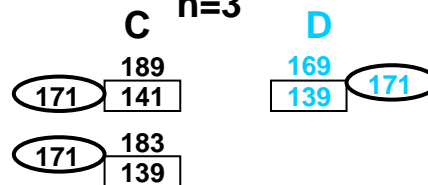

Children

3(n=5)

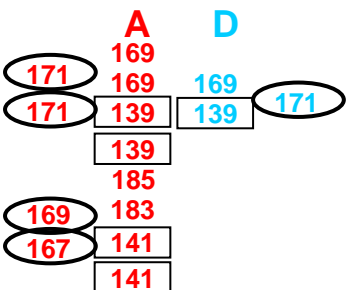

4(n=6) R(mat)

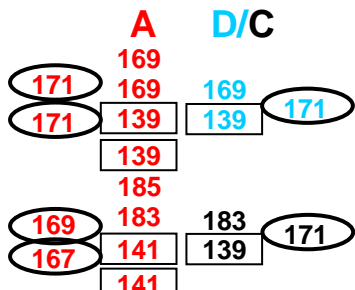

5(n=3)

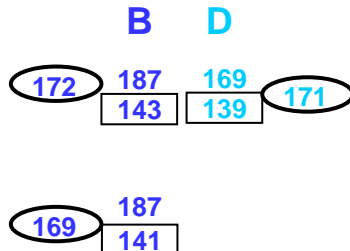

6(n=3) R(mat)

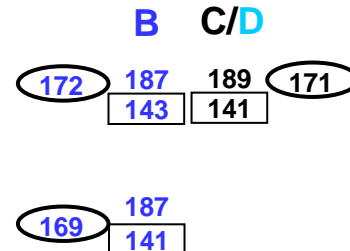

7(n=4) R(pat)

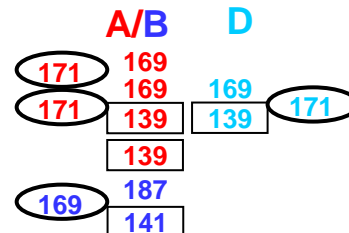

8(n=5)

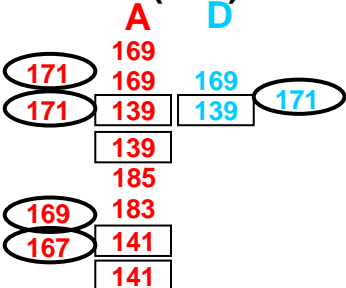

9(n=5) R(mat)

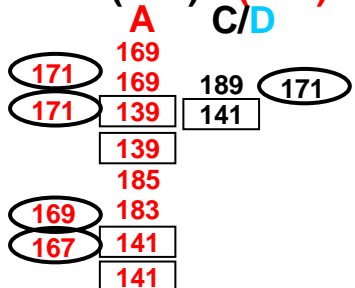

10(n=5)

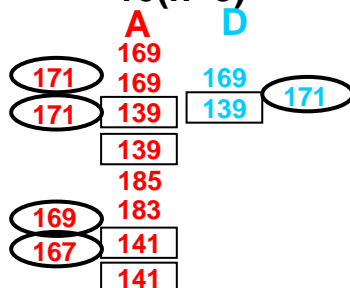

11(n=4)

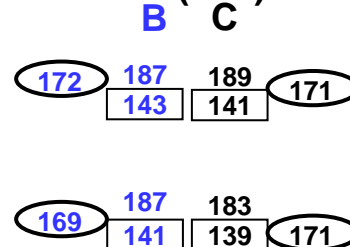

12(n=5)

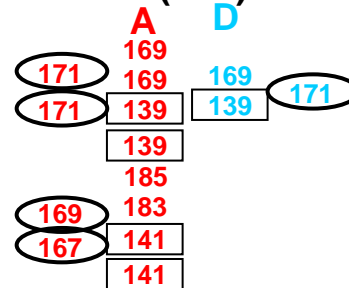

13(n=5)

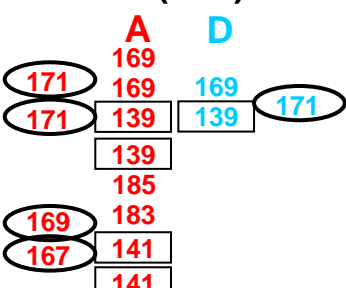

14(n=4) R(pat)

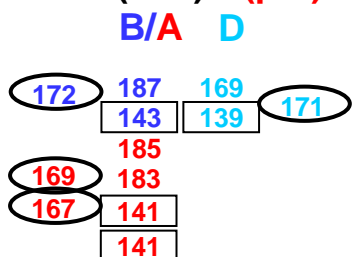

15(n=4) R(mat)

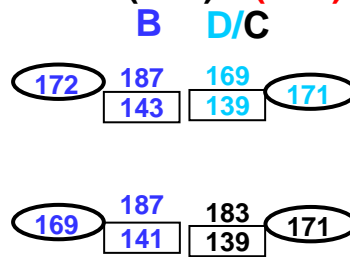

16(n=4) R(mat)

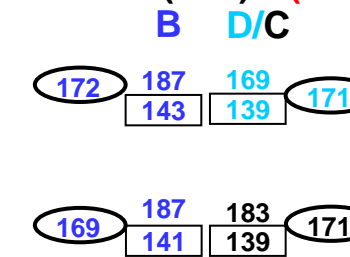

13(n=6)

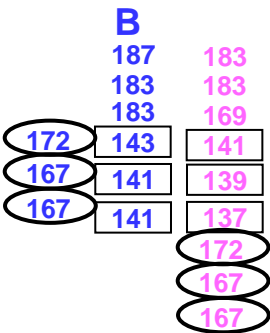

14(n=5)

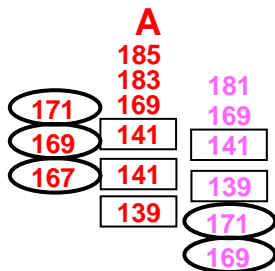

### CEPH Family 104

01(Father)

n=6

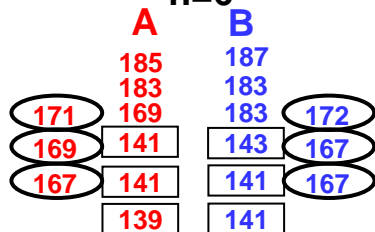

02(Mother)

n=3

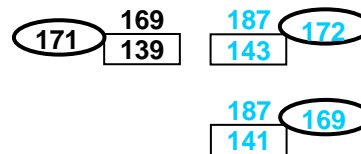

### Children

3(n=5)

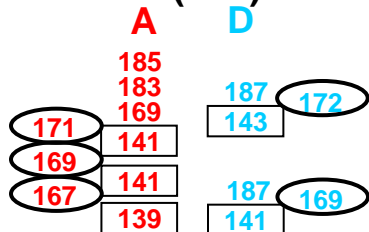

4(n=5)

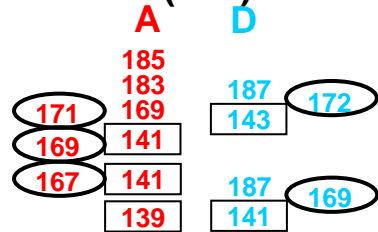

5(n=5)

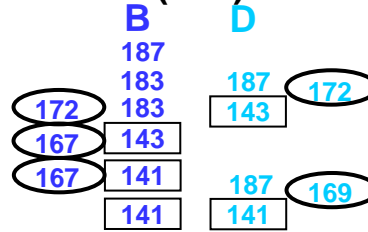

6(n=5) R(mat)

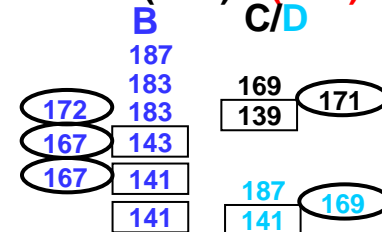

7(n=4) R(mat)

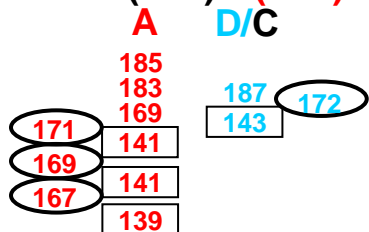

8(n=5)

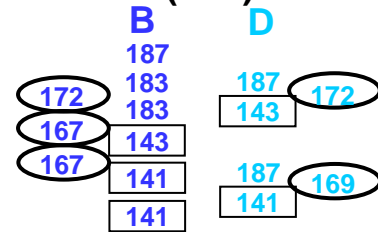

9(n=4)

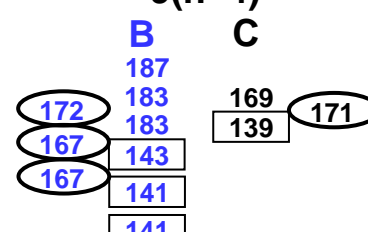

10(n=5)

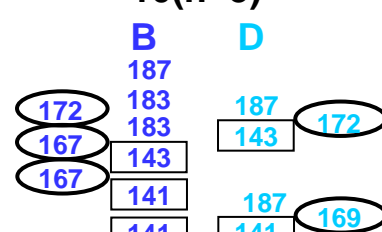

11(n=4)

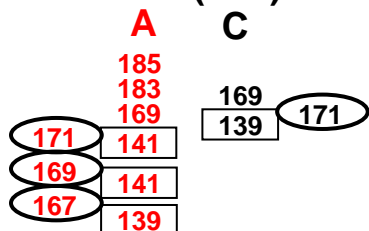

12(n=4)

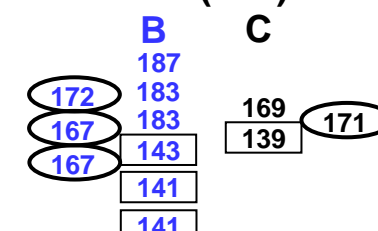

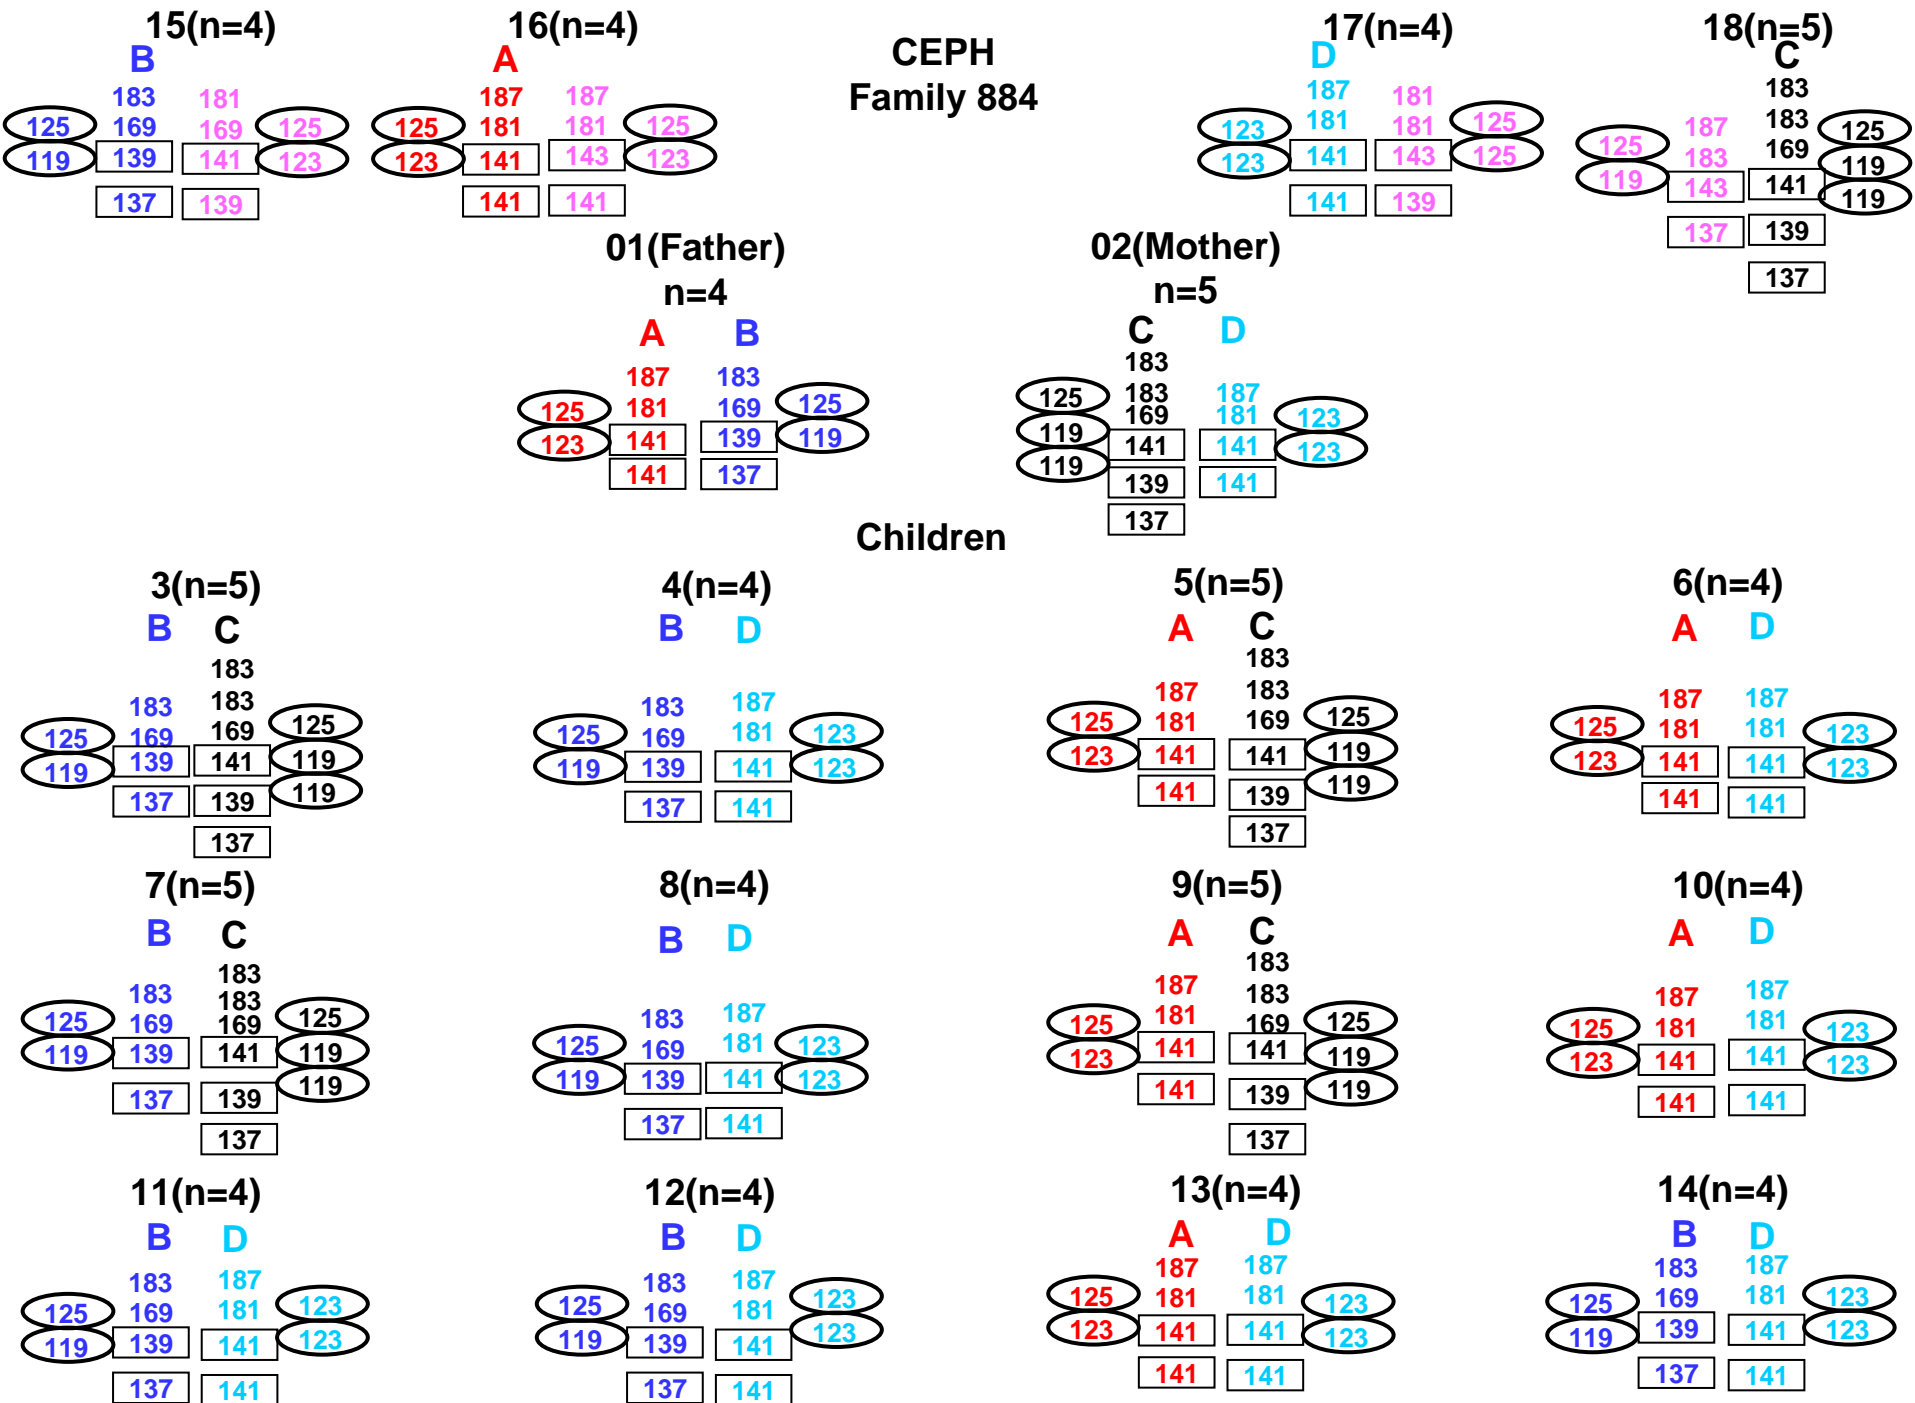

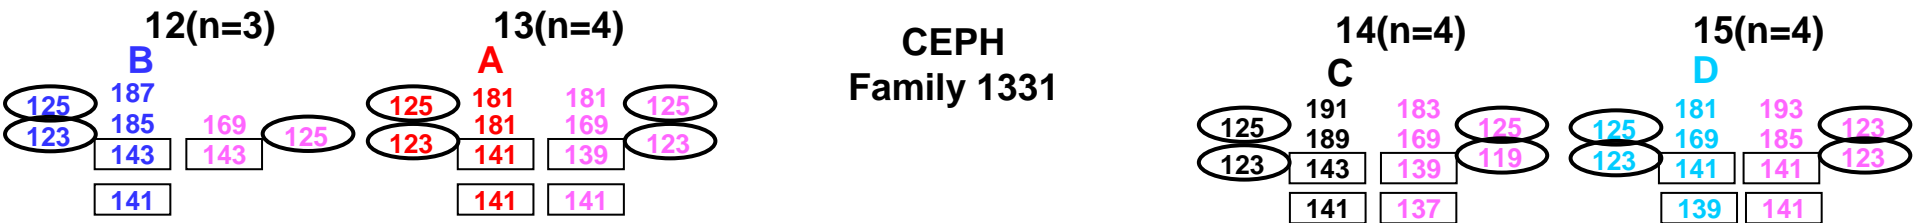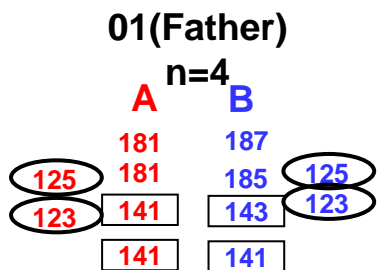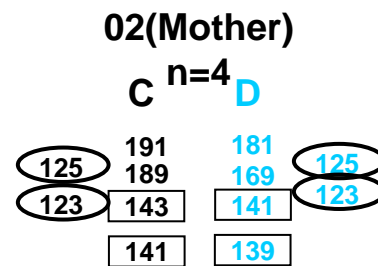

**Children**

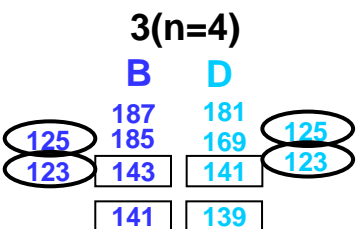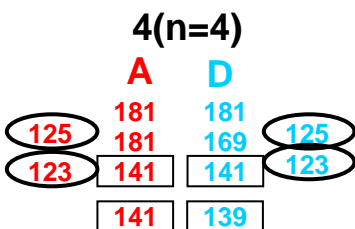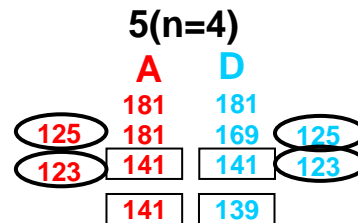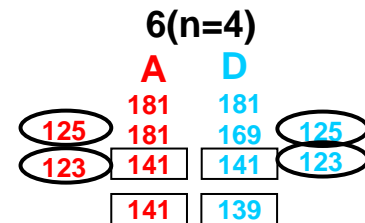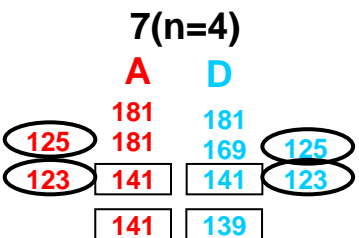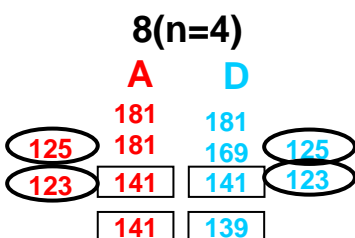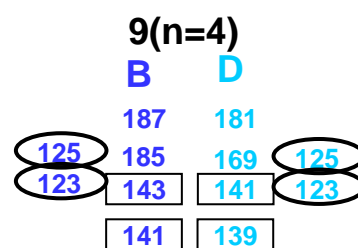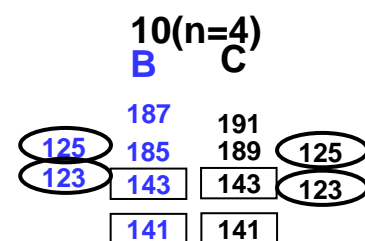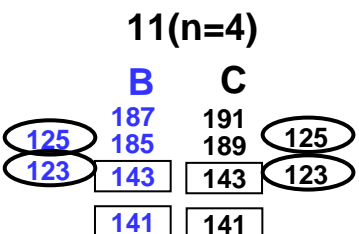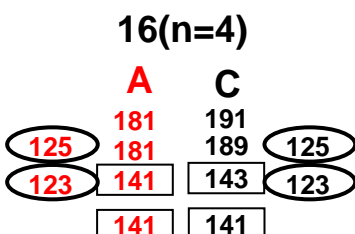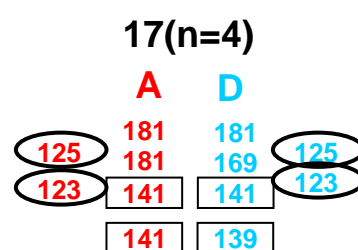

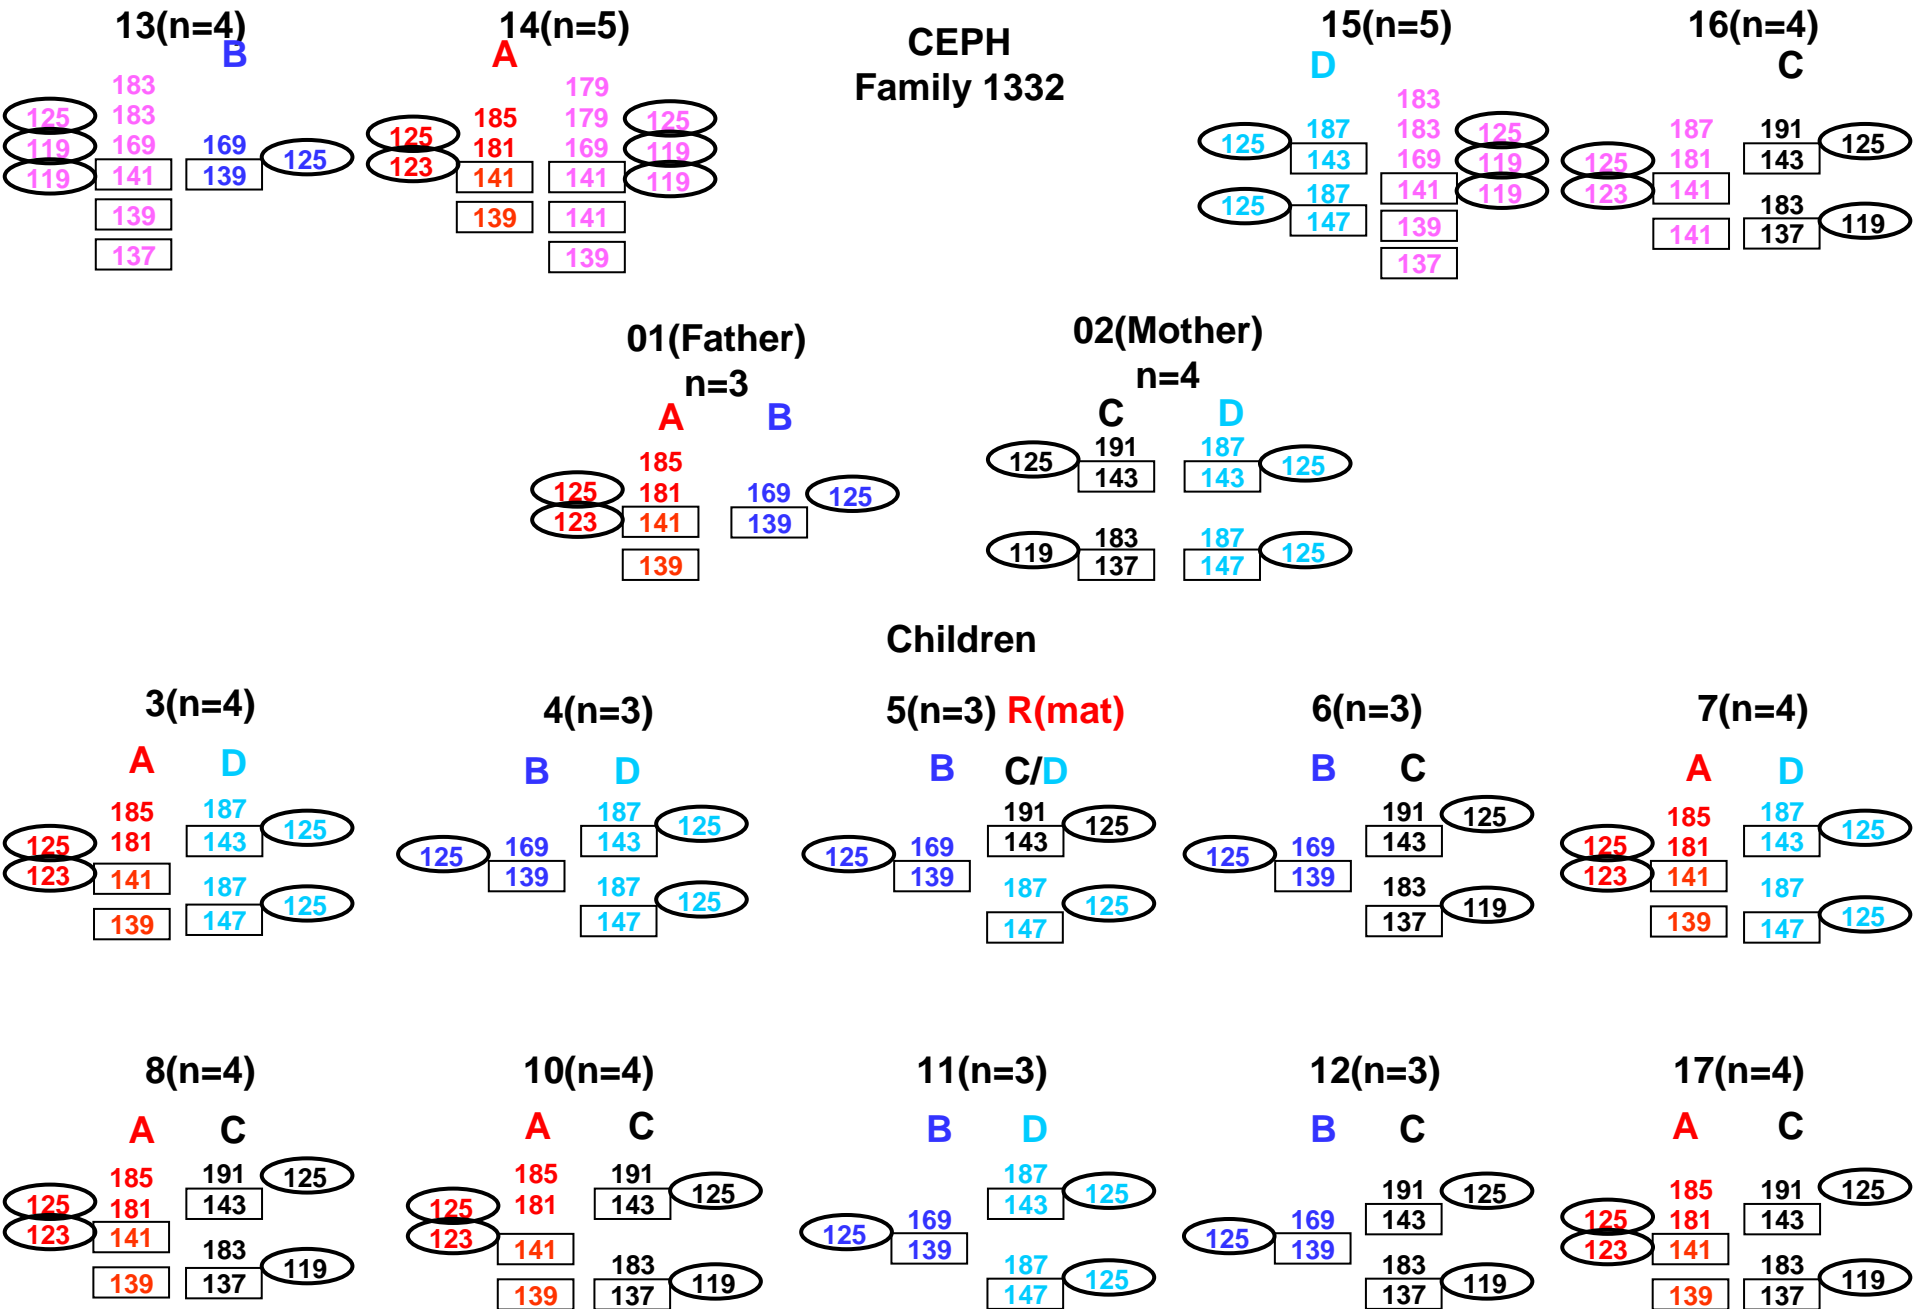

CEPH  
Family 1333

11(n=4)

B

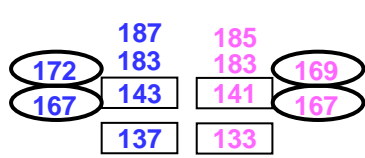

12(n=3)

A

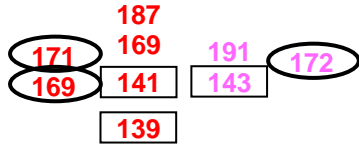

13(n=6)

D

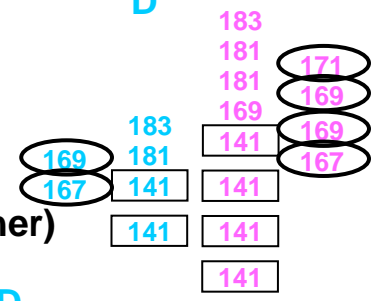

14(n=4)

C

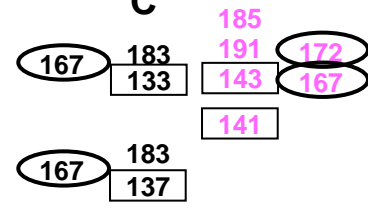

01(Father)

n=4

A

B

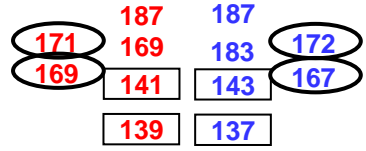

02(Mother)

n=4

C

D

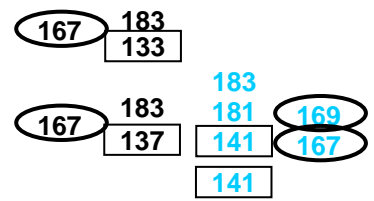

Children

3(n=4)

B

C

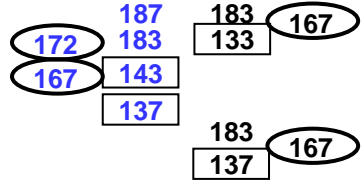

4(n=4)

A

D

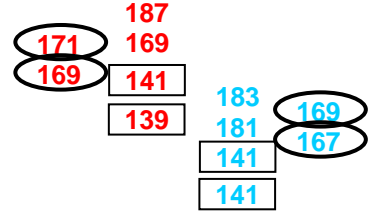

5(n=4)

B

C

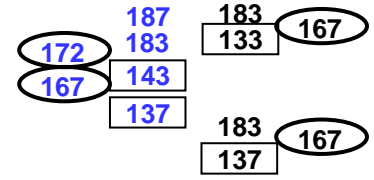

6(n=5) R(mat)

A

C/D

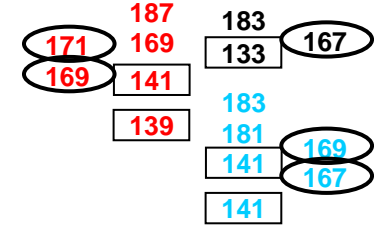

7(n=4)

B

D

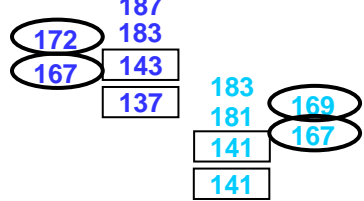

8(n=4)

A

C

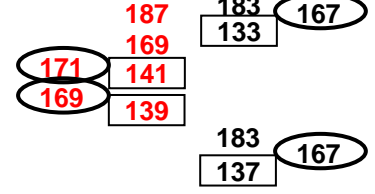

9(n=4)

A

C

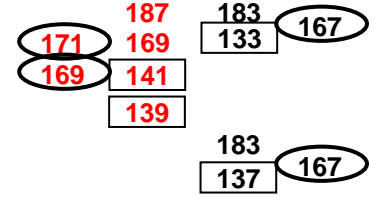

10(n=4)

B

C

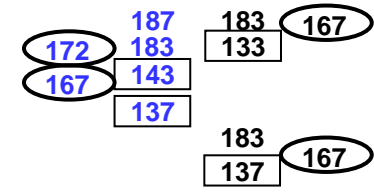

CEPH  
Family 1334

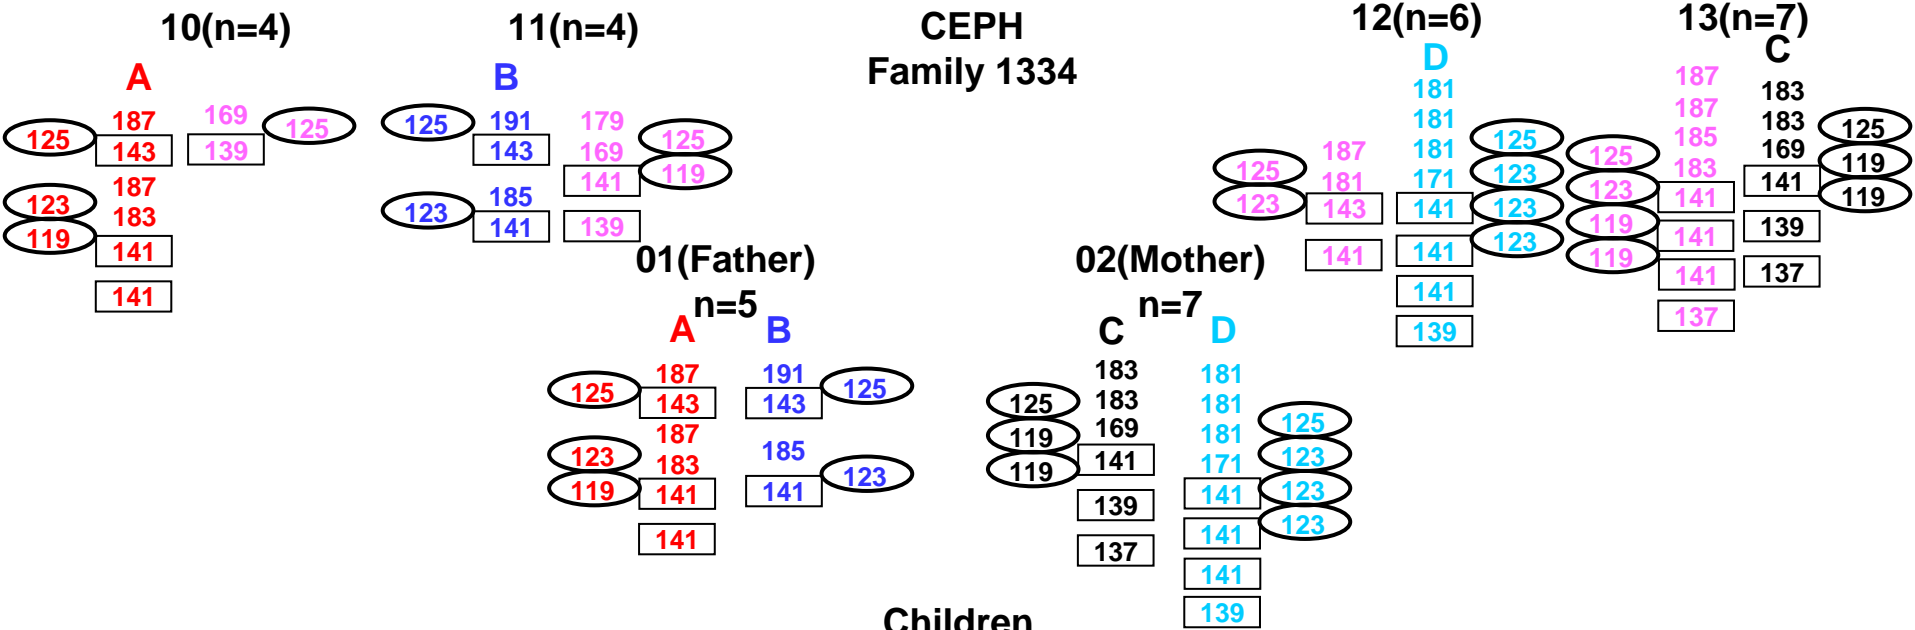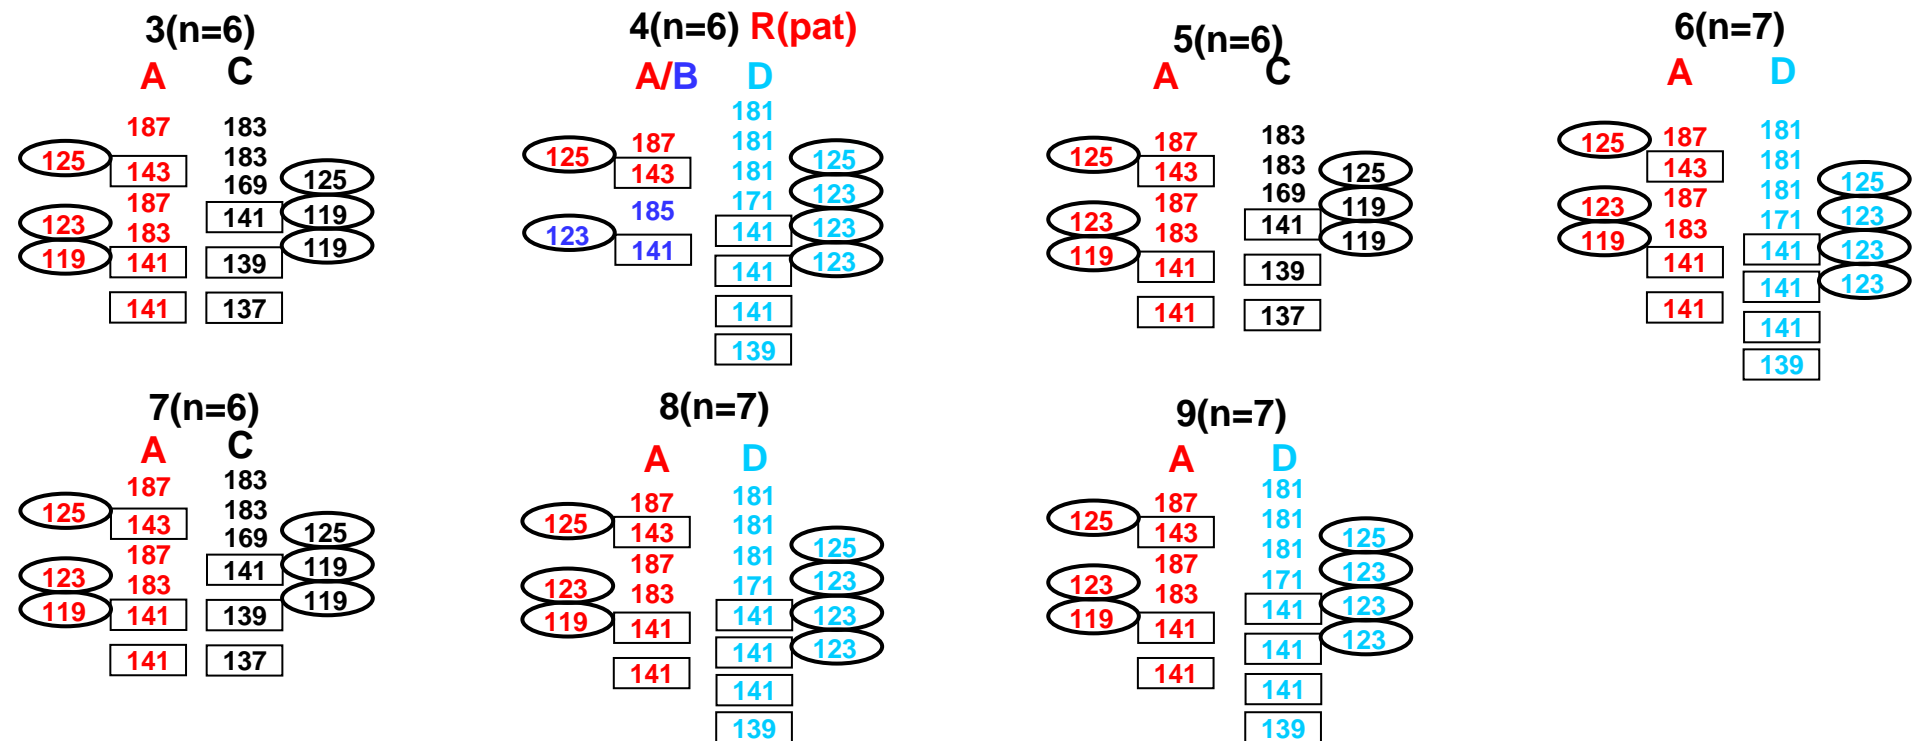



CEPH  
Family 1341

11(n=4)

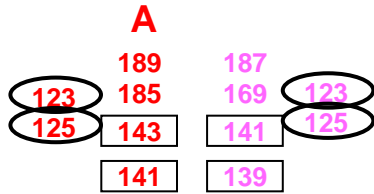

01(Father)  
n=4

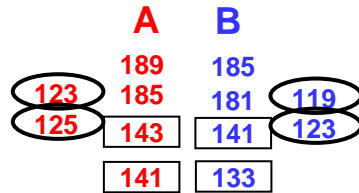

02(Mother)  
n=4

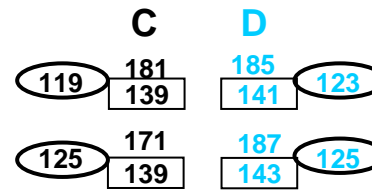

Children

3(n=4)

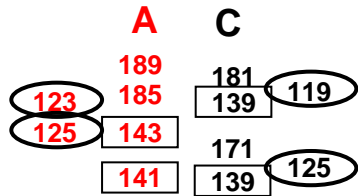

4(n=4)

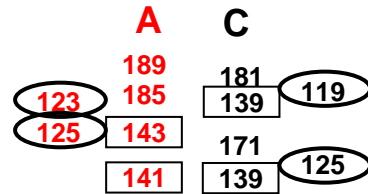

5(n=4)

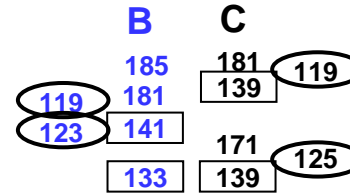

6(n=4) **R(mat)**

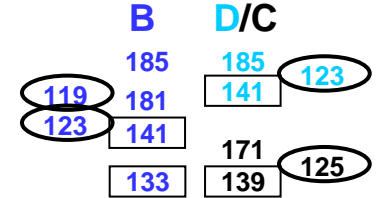

8(n=4)

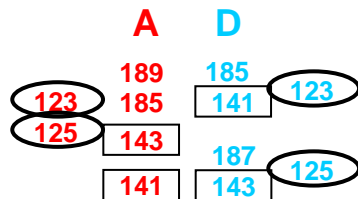

9(n=4) **R(mat)**

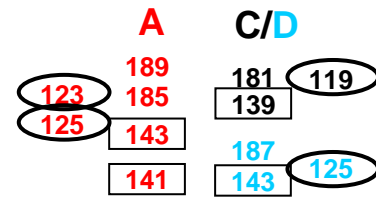

10(n=4)

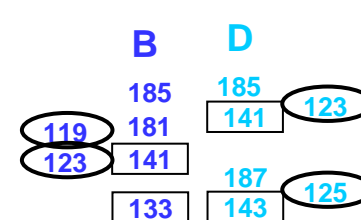

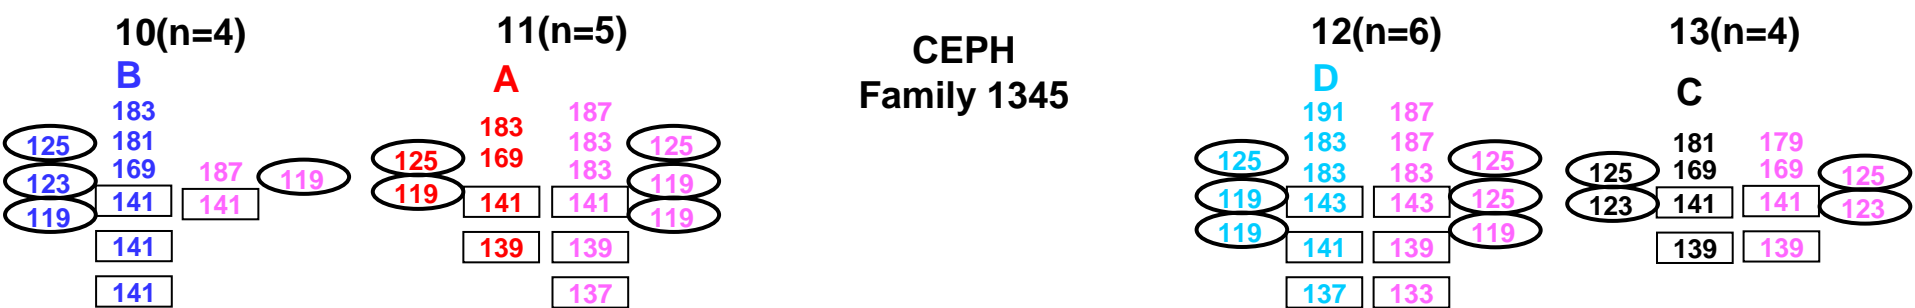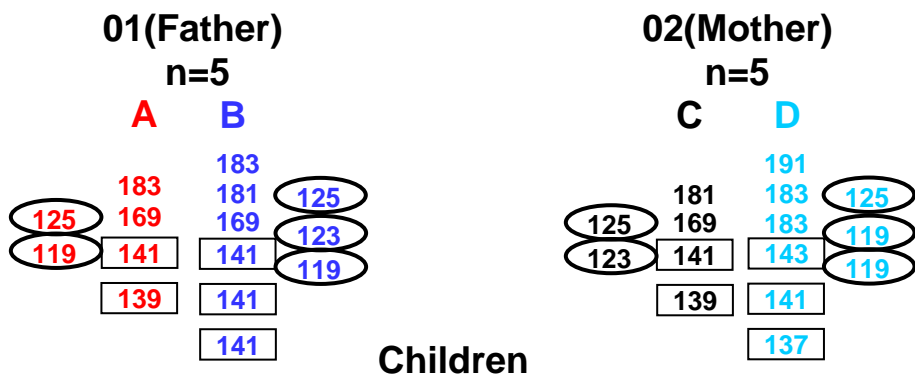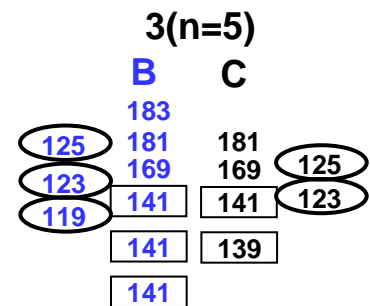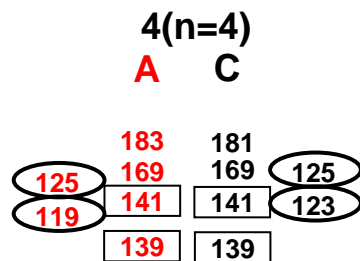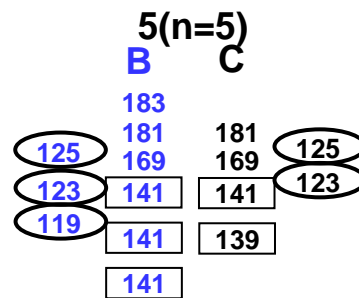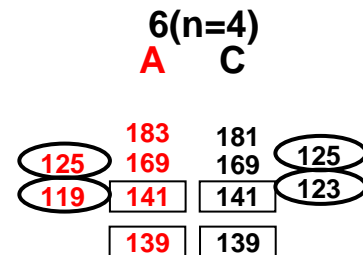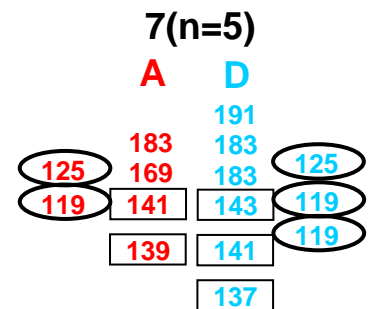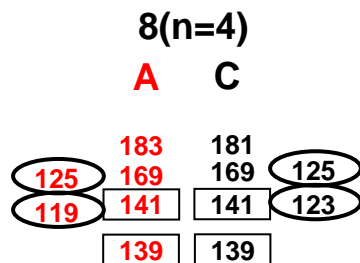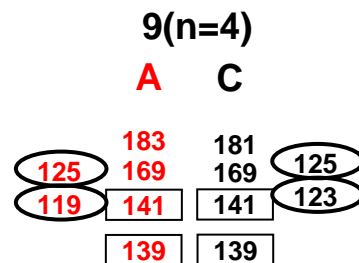

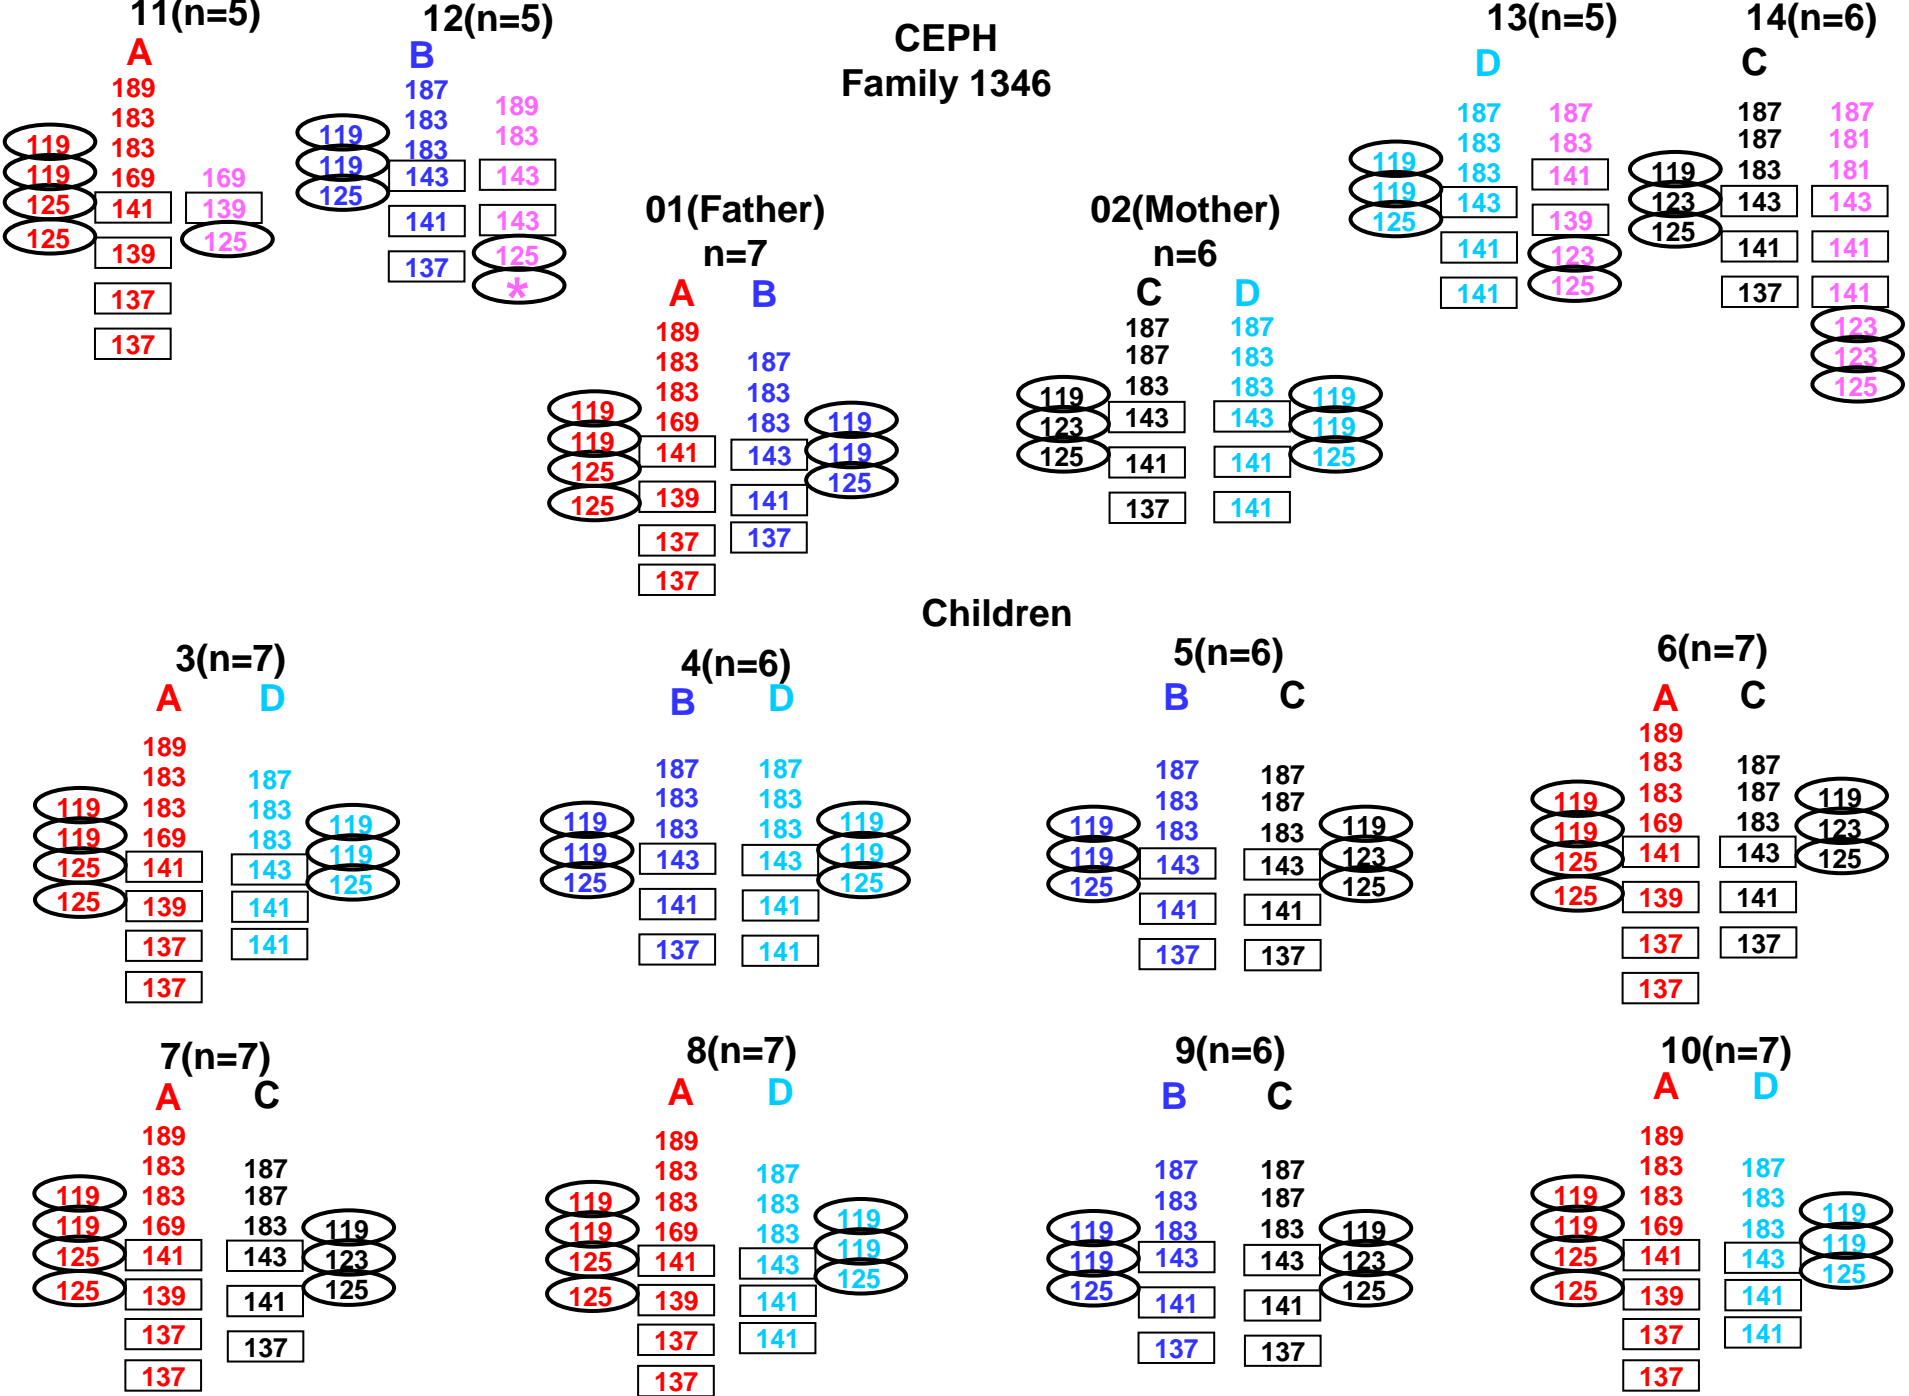

CEPH  
Family 1350

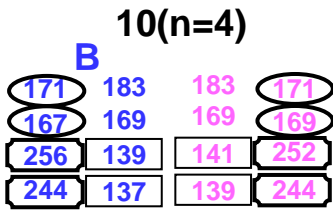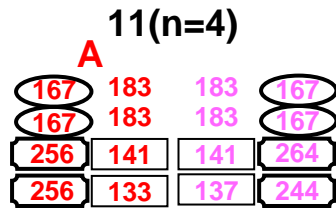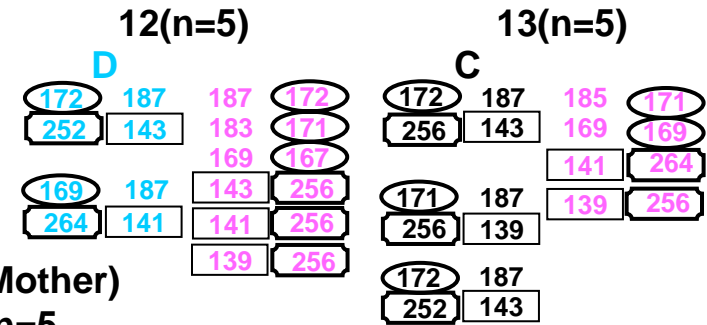

01(Father)  
n=4

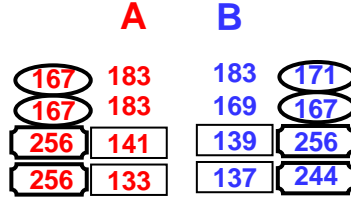

02(Mother)  
n=5

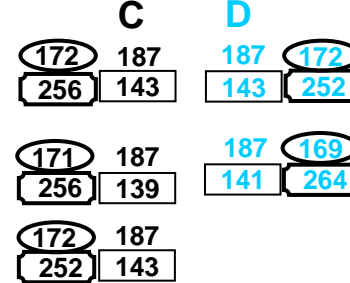

Children

3(n=5)

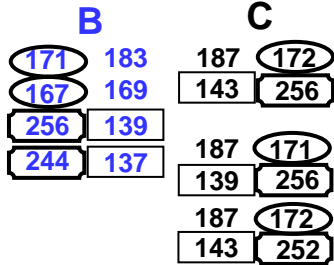

4(n=5)

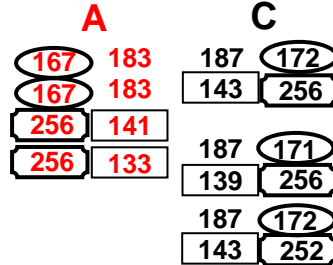

5(n=5) R(mat)

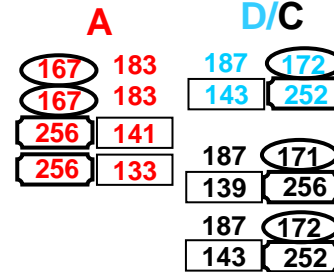

6(n=4) R(mat)

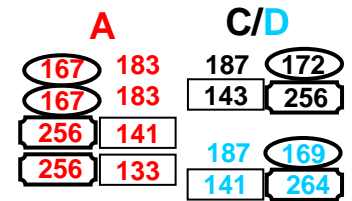

7(n=4)

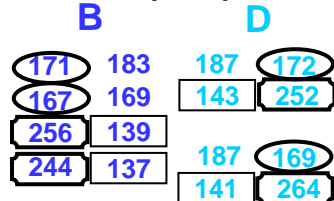

8(n=4) R(mat)

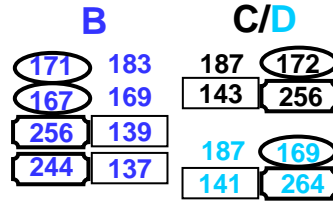

9(n=5) R(mat)

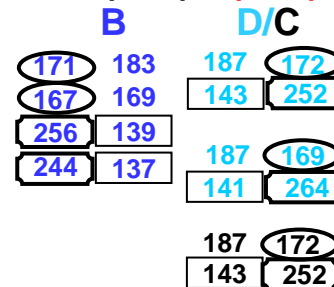

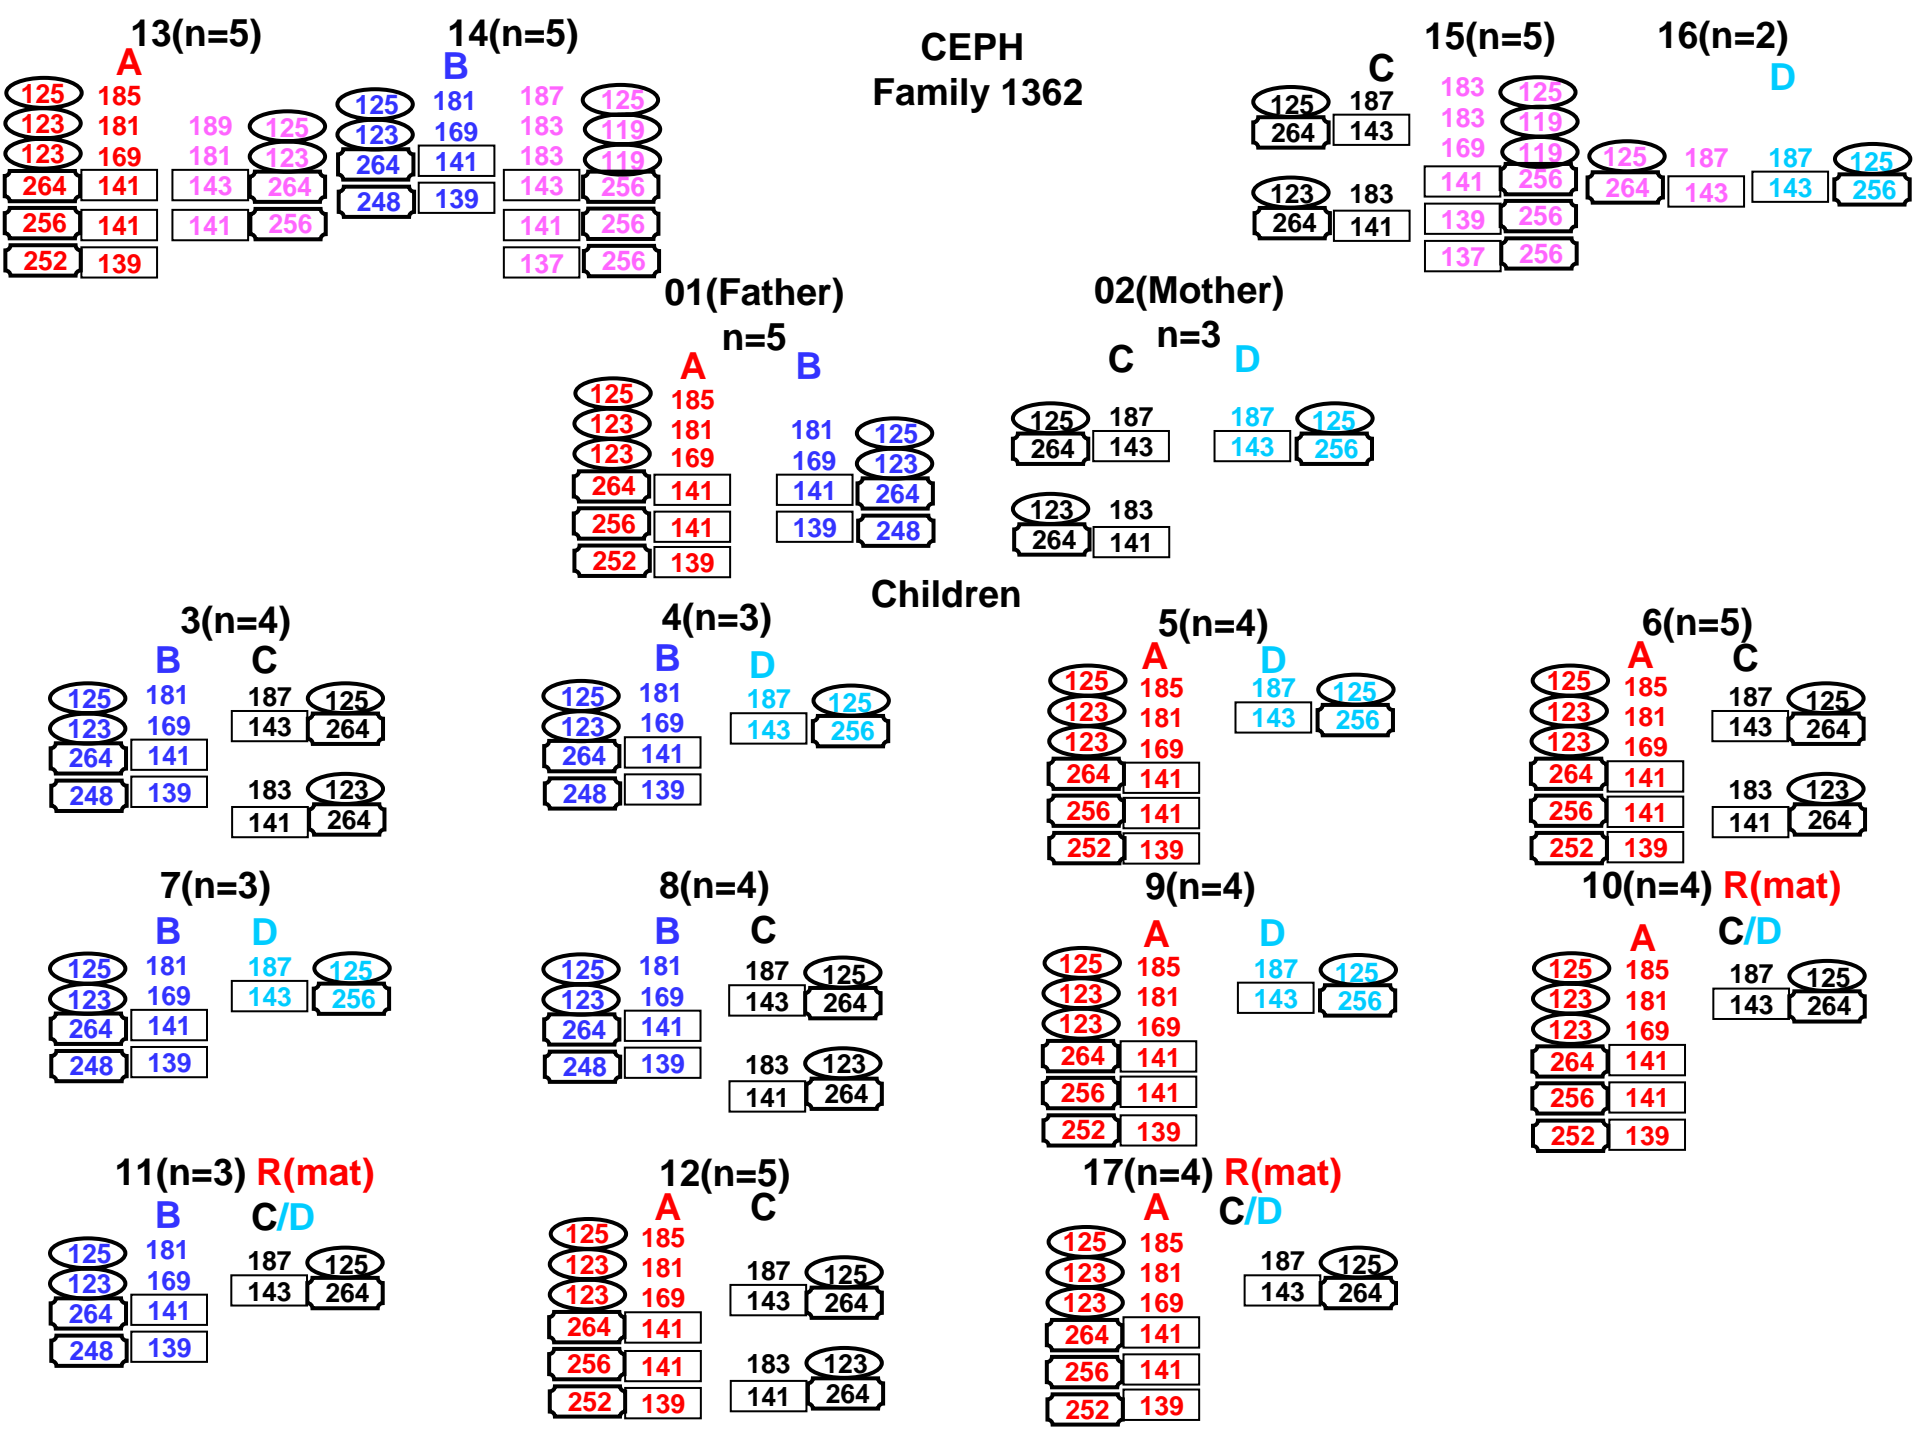

9(n=4)

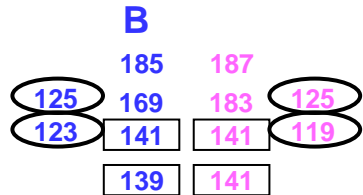

CEPH  
Family 1375

11(n=4)

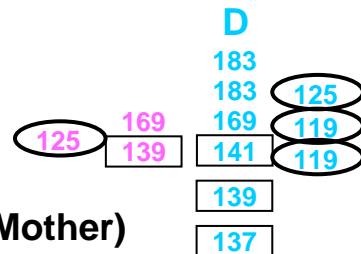

12(n=3)

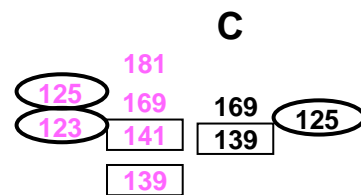

01(Father)  
n=4

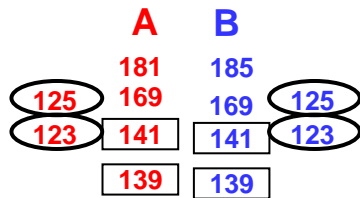

02(Mother)  
n=4

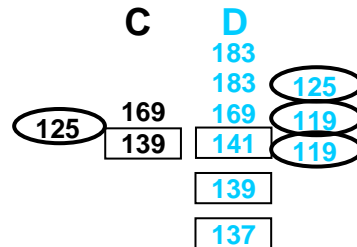

Children

3(n=3)

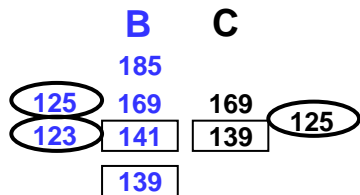

4(n=3)

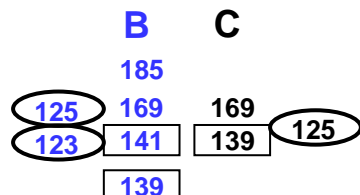

5(n=5)

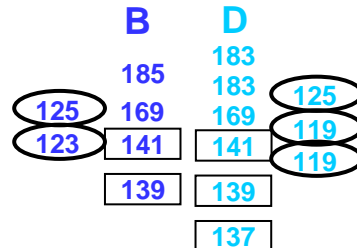

6(n=3)

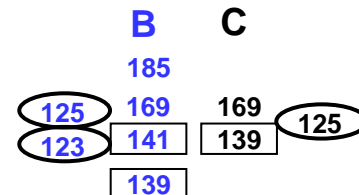

7(n=5)

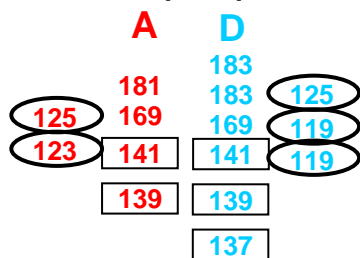

8(n=3)

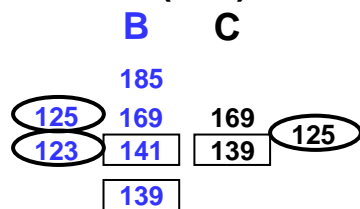

13(n=3)

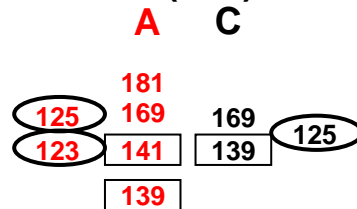

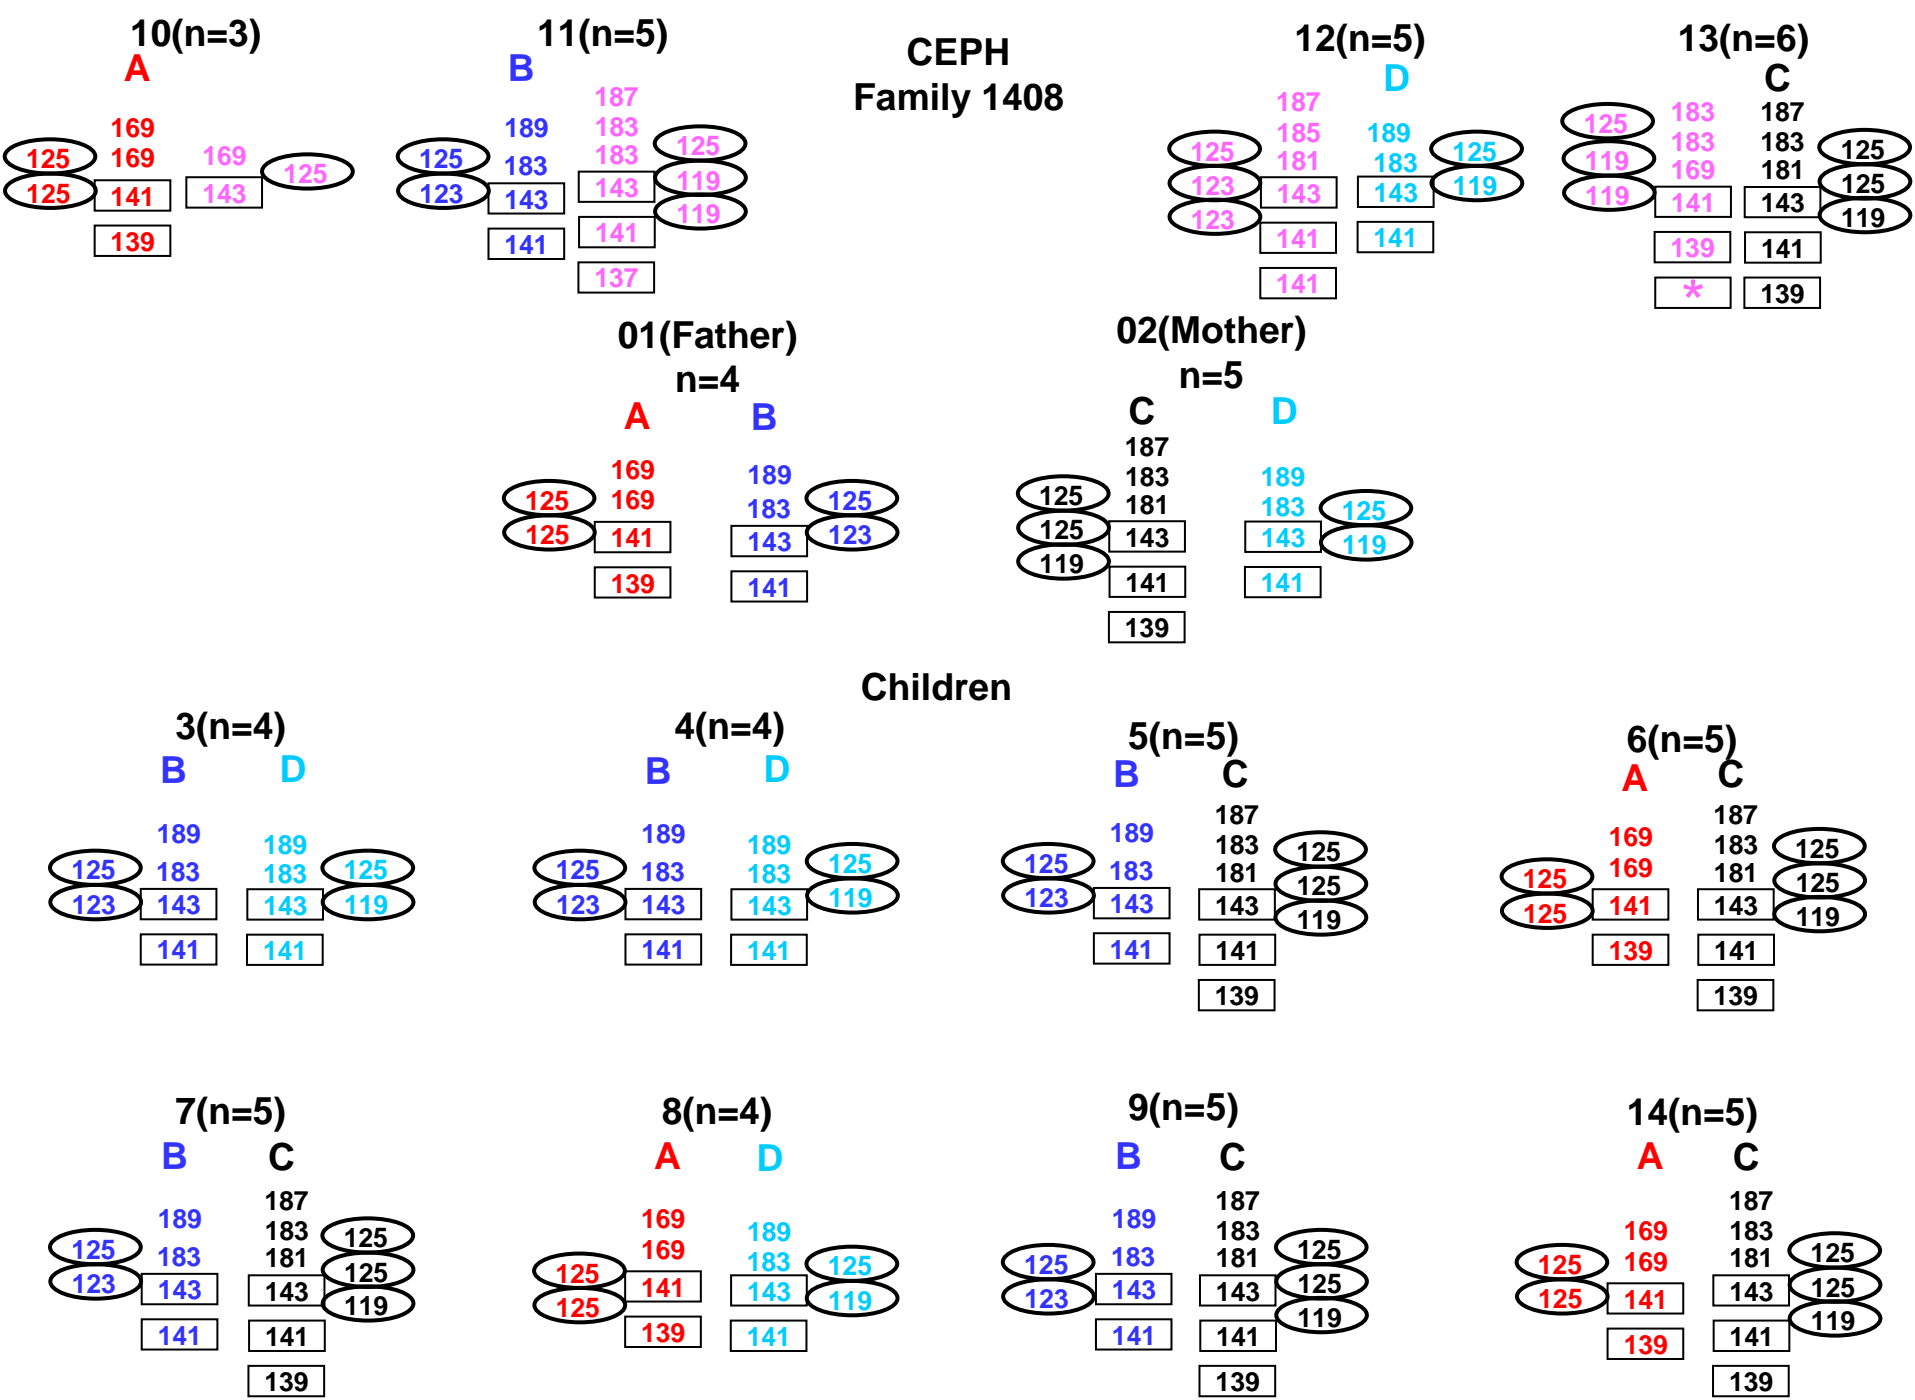

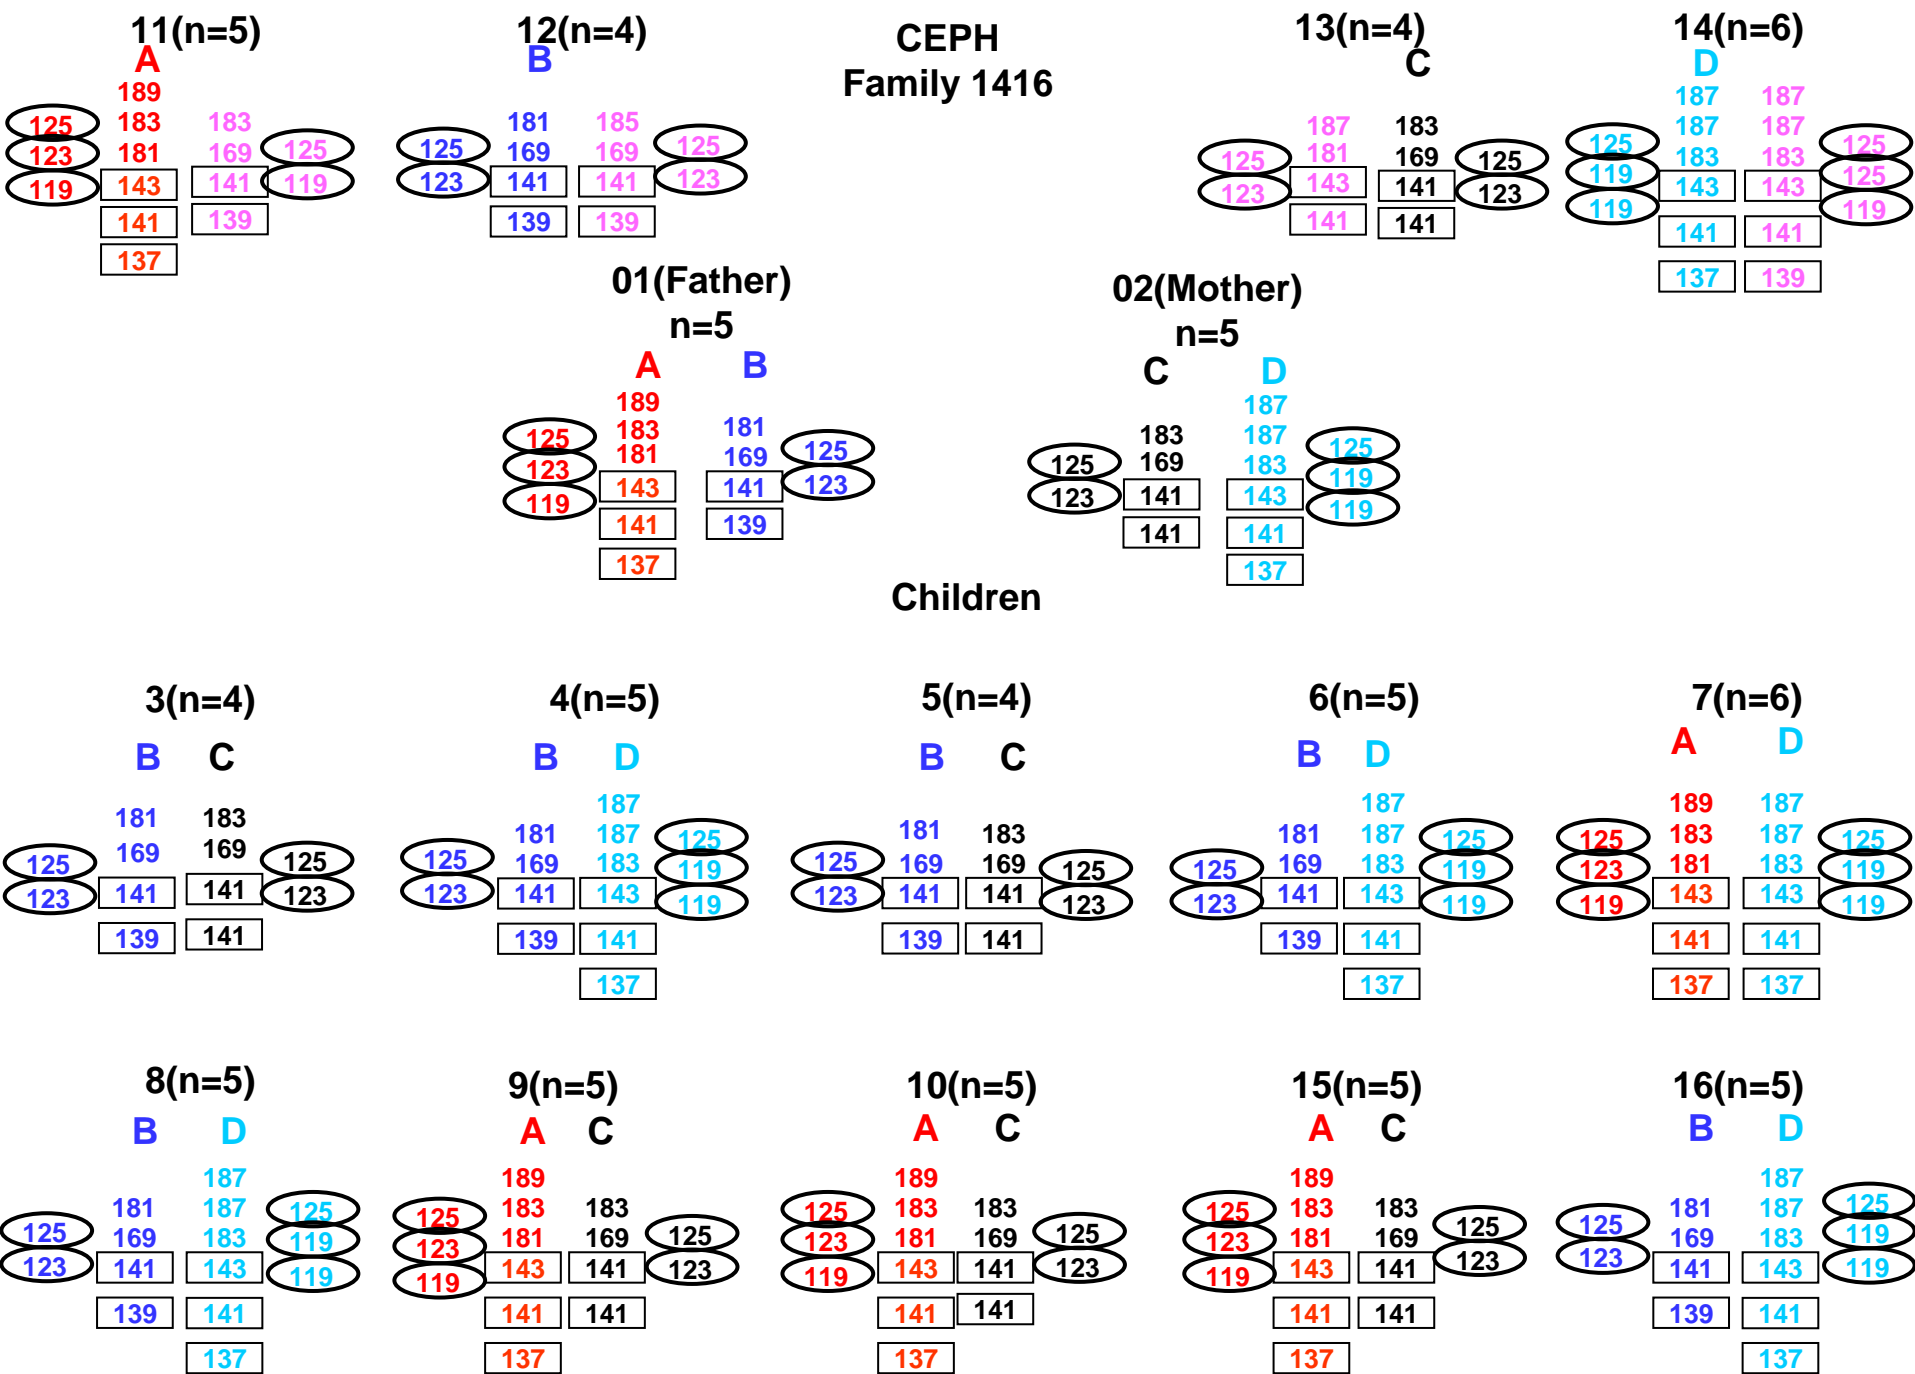



# CEPH Family 1421

01(Father)  
n=6

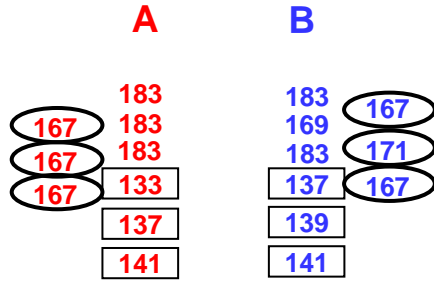

02(Mother)  
n=4

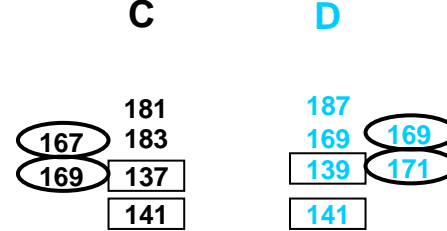

## Children

3(n=5)

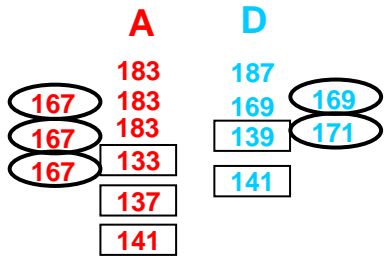

4(n=5)

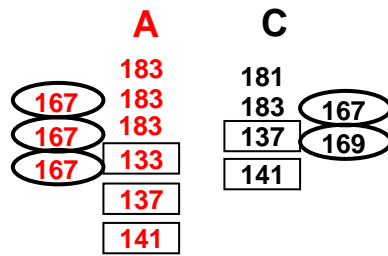

5(n=5)

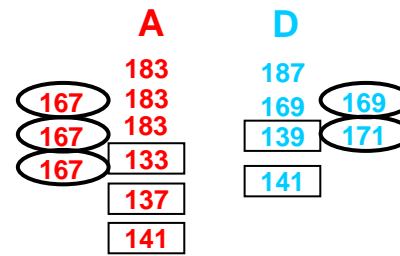

6(n=5)

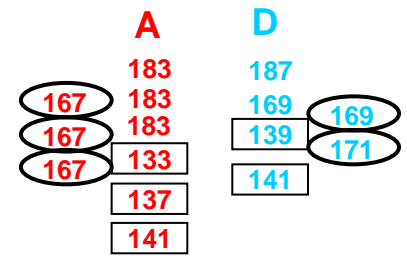

CEPH  
Family 1424

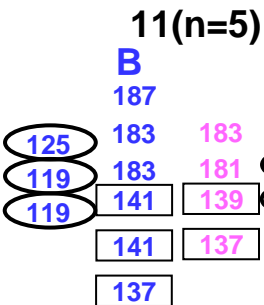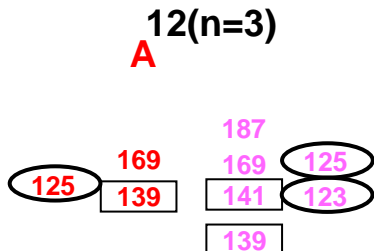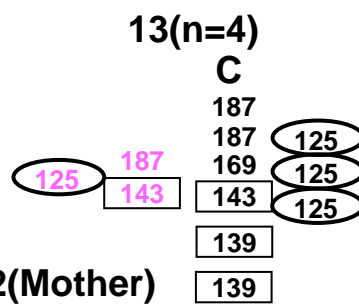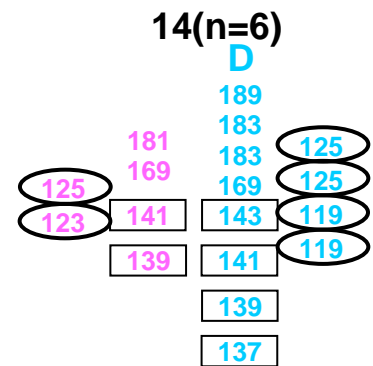

**01(Father)**  
n=4

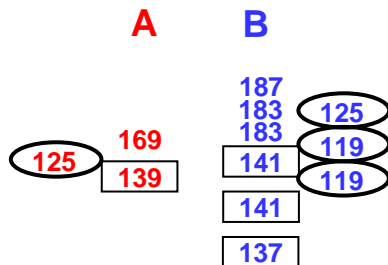

**02(Mother)**  
n=7

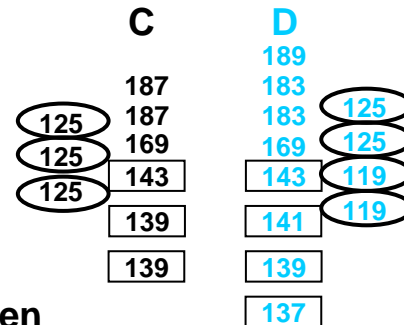

Children

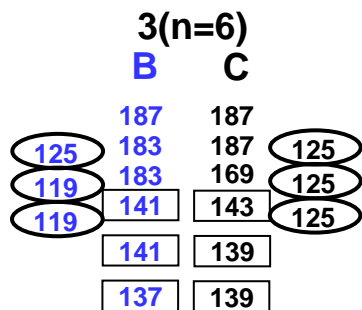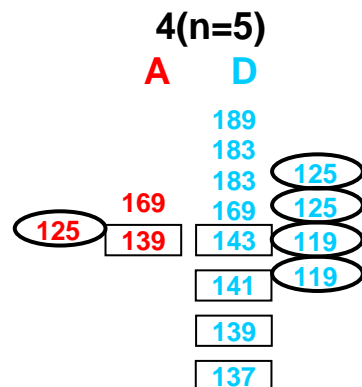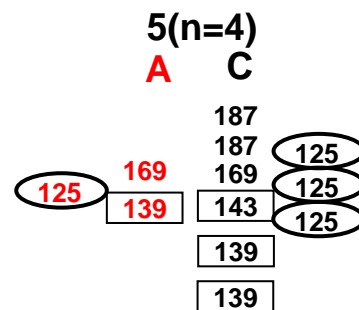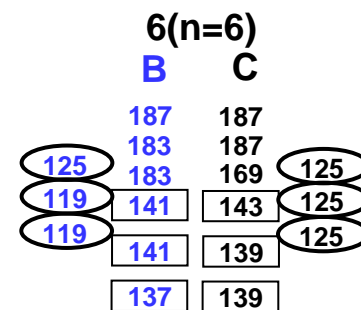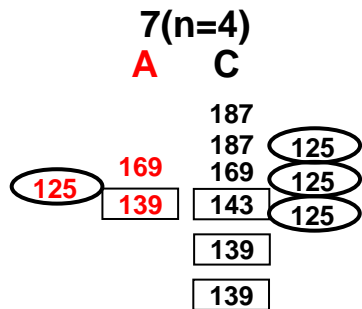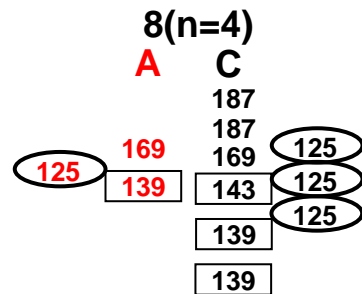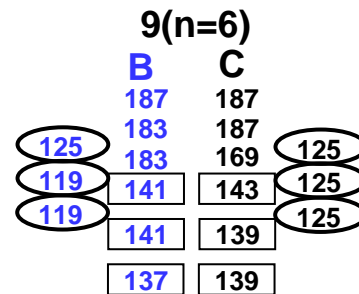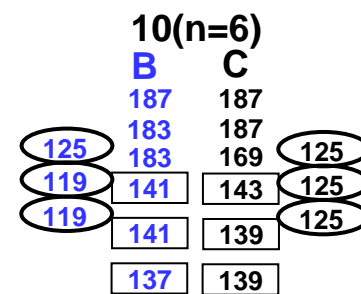

CEPH  
Family 13292

12(n=5)

13(n=6)

C

D

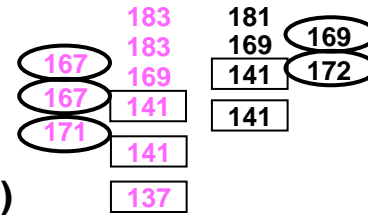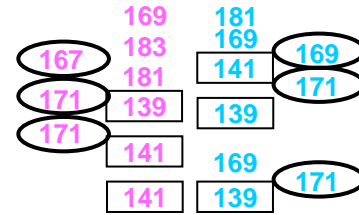

01(Father)

02(Mother)

n=4

n=6

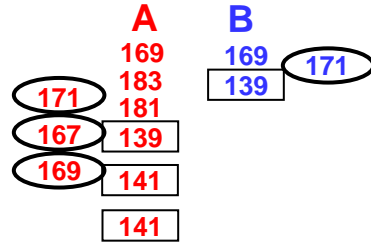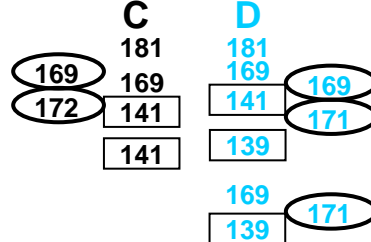

Nature of crossover in child 6, and placement of maternal repeats, ambiguous because of allele sharing between maternal haplotypes

Children

3(n=5)

4(n=5)

5(n=3)

6(n=3) R(mat)

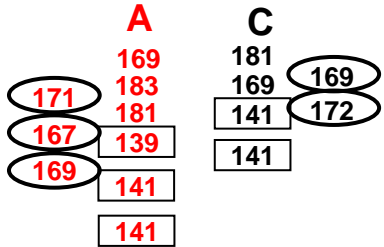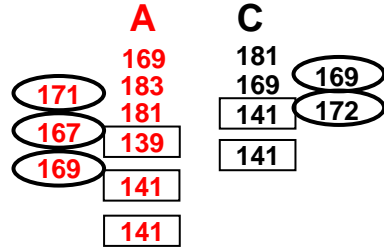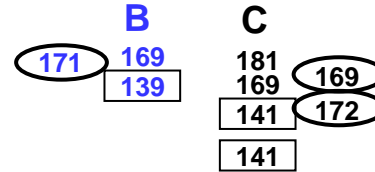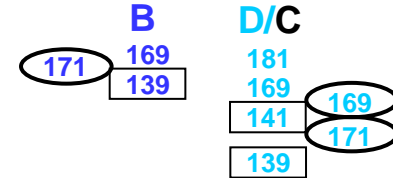

or

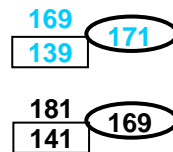

7(n=6)

8(n=4)

9(n=3)

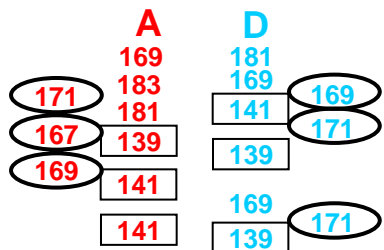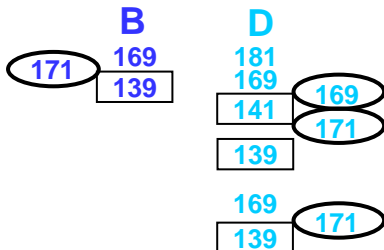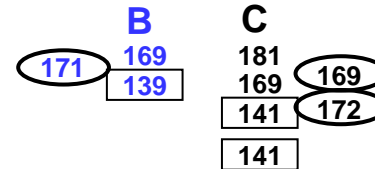

# CEPH Family 13294

**01(Father)**

n=6

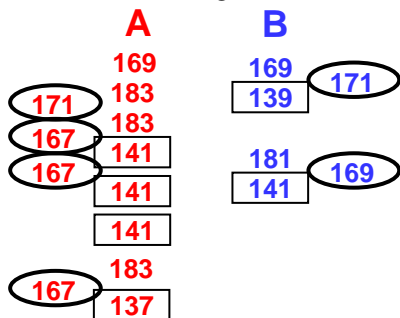

**02(Mother)**

n=5

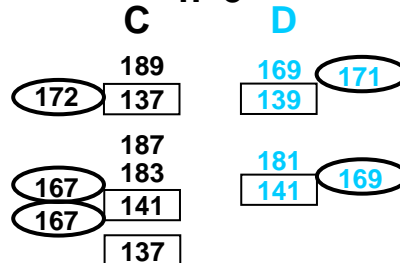

**Children**

**3(n=5)**

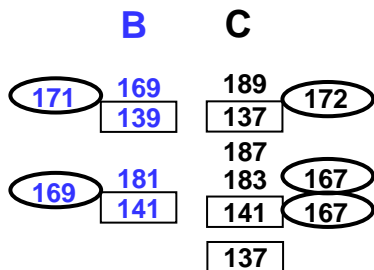

**4(n=6) R(mat)**

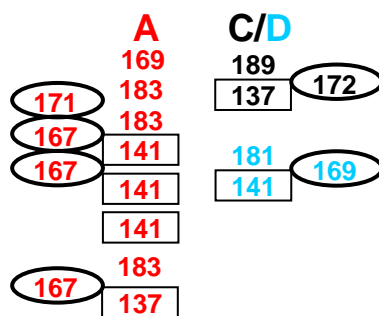

**5(n=6)**

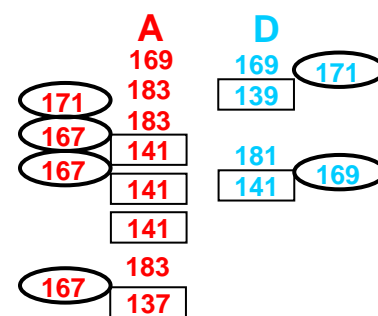

**6(n=5)**

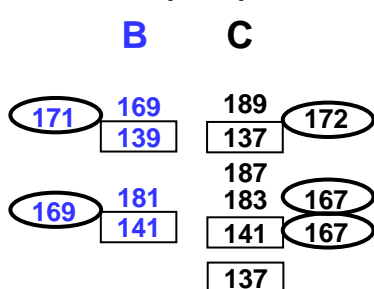

**7(n=5) R(pat)**

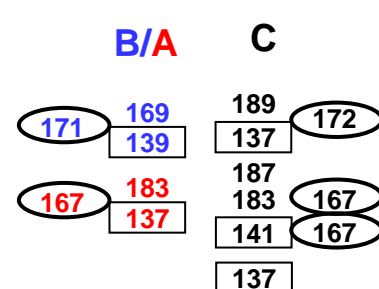

**8(n=6)**

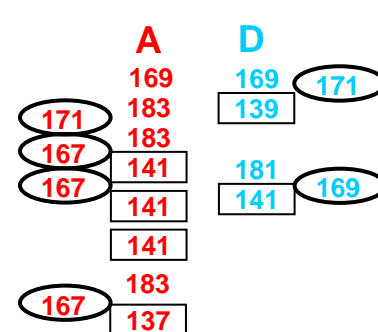

Supplement: 0809073106_ST2_PDF.pdf [file 0809073106_ST2_PDF.pdf]
