# Supplementary material
Source: PubMed Central journal article supplement (PMC2630076)
Supplement: 0809073106_0809073106SI.pdf [file 0809073106_0809073106SI.pdf]

# Supporting Information

Abu Bakar *et al.* 10.1073/pnas.0809073106

**Table S1. Properties of 24 crossovers in CEPH pedigrees leading to reassortment of  $\beta$ -defensin repeat units**

| Crossover child | Parental origin | $\beta$ -Defensin copy number |          | Distal flanking genetic marker | Assembly coordinate | Proximal flanking genetic marker | Assembly coordinate | Copy number change? |
|-----------------|-----------------|-------------------------------|----------|--------------------------------|---------------------|----------------------------------|---------------------|---------------------|
|                 |                 | Distal                        | Proximal |                                |                     |                                  |                     |                     |
| 10204           | M               | 1                             | 1        | AFMb294yg5/(AC)n               | 11515050            | AFM320yf1/(AC)n                  | 12786453            | No                  |
| 10206           | M               | 1                             | 0        | afm304ze9/(AC)n                | 10918926            | rs2898254                        | 10929940            | No                  |
| 10207           | P               | 2                             | 1        | rs751009                       | 6741958             | rs895252                         | 8997910             | Yes                 |
| 10209           | M               | 1                             | 0        | afm304ze9/(AC)n                | 10918926            | rs2898254                        | 10929940            | No                  |
| 10214           | P               | 1                             | 2        | rs751009                       | 6741958             | rs895252                         | 8997910             | Yes                 |
| 10215           | M               | 1                             | 1        | rs2898254                      | 10929940            | AFM144zb2/(AC)n                  | 11317121            | No                  |
| 10216           | M               | 1                             | 1        | AFMa216zb1/(AC)n               | 10177958            | afm304ze9/(AC)n                  | 10918926            | No                  |
| 10406           | M               | 1                             | 1        | cos140B11/pcr                  | 9781807             | rs2898254                        | 10929940            | No                  |
| 10407           | M               | 1                             | 0        | rs2001329                      | 11024269            | rs2203837                        | 12864210            | No                  |
| 133205          | M               | 1                             | 1        | AFMa216zb1/(AC)n               | 10177958            | afm304ze9/(AC)n                  | 10918926            | No                  |
| 133306          | M               | 1                             | 2        | rs2001329                      | 11024269            | rs2203837                        | 12864210            | Yes                 |
| 133404          | P               | 1                             | 1        | cos140B11/pcr                  | 9781807             | afm304ze9/(AC)n                  | 10918926            | No                  |
| 134106          | M               | 1                             | 1        | afm198wd2/(AC)n                | 6504084             | rs433960                         | 8805729             | No                  |
| 134109          | M               | 1                             | 1        | afm198wd2/(AC)n                | 6504084             | rs433960                         | 8805729             | No                  |
| 135005          | M               | 1                             | 2        | cos140B11/pcr                  | 9781807             | afm304ze9/(AC)n                  | 10918926            | No                  |
| 135006          | M               | 1                             | 1        | rs895252                       | 8997910             | cos140B11/pcr                    | 9781807             | No                  |
| 135008          | M               | 1                             | 1        | rs895252                       | 8997910             | cos140B11/pcr                    | 9781807             | No                  |
| 135009          | M               | 1                             | 2        | rs2001329                      | 11024269            | GATA23D06/pcr                    | 12880230            | No                  |
| 136210          | M               | 1                             | 0        | afm304ze9/(AC)n                | 10918926            | AFMa216zb1/(AC)n                 | 10177958            | No                  |
| 136211          | M               | 1                             | 0        | afm304ze9/(AC)n                | 10918926            | AFMa216zb1/(AC)n                 | 10177958            | No                  |
| 136217          | M               | 1                             | 0        | AFMa216zb1/(AC)n               | 10177958            | rs433960                         | 8805729             | No                  |
| 1329206         | M               | (ambiguous)                   |          | rs2898254                      | 10929940            | rs939557                         | 12814009            | No                  |
| 1329404         | M               | 1                             | 1        | rs751009                       | 6741958             | rs2898254                        | 10929940            | No                  |
| 1329407         | P               | 1                             | 1        | rs881362                       | 6686304             | rs433960                         | 8805729             | No                  |

The numbers of copies of  $\beta$ -defensin at the proximal and distal sites are shown for the recombinant haplotype. The final column indicates events leading to a recombinant haplotype with a copy number not found on either parental haplotype. Maternal haplotypes in family 1362 are in the inverted orientation, and distal and proximal markers are shown in the corresponding order.

## Other Supporting Information Files

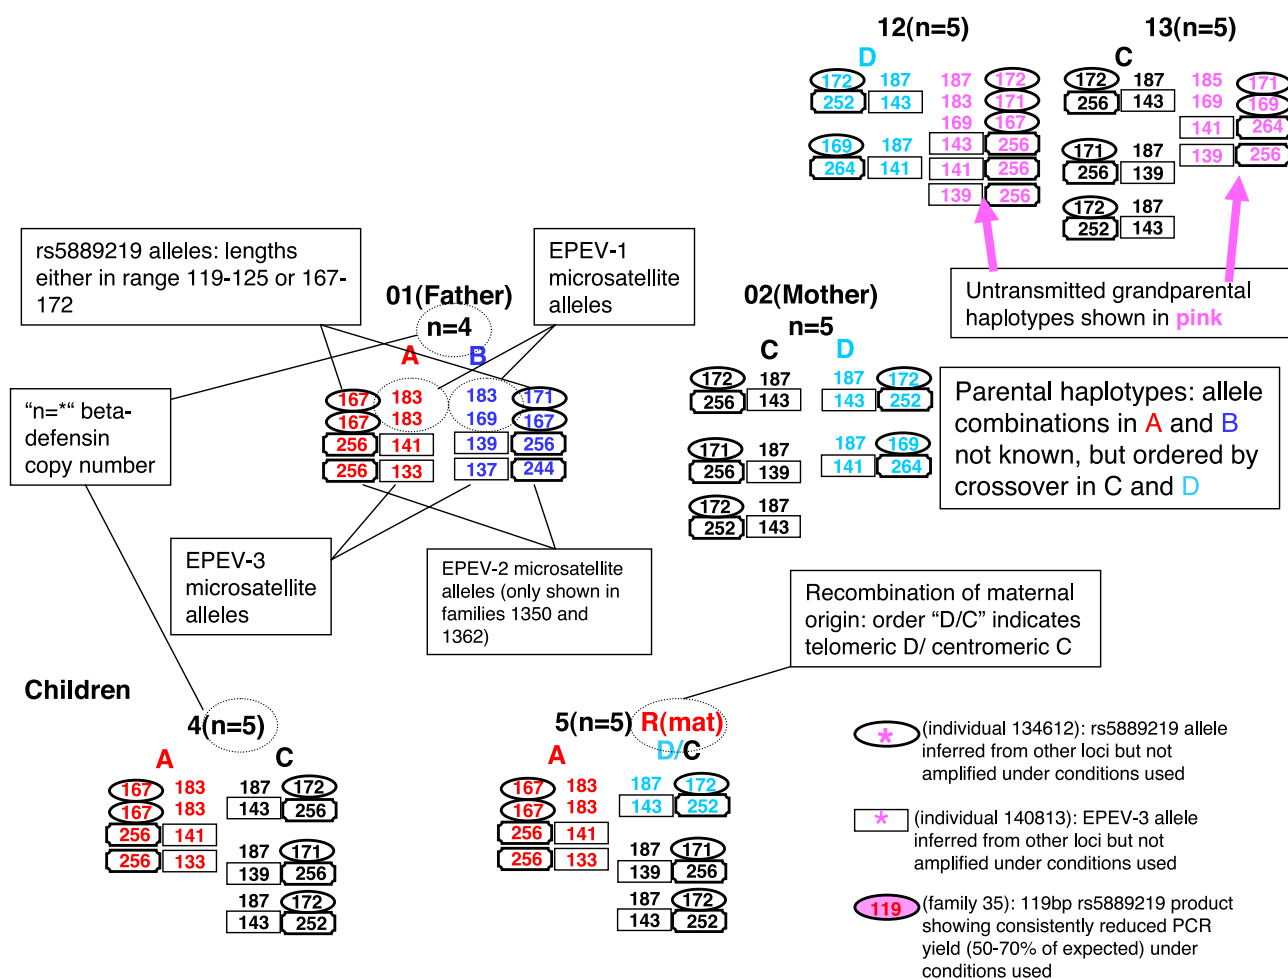

**Fig. S1.** Diagrammatic summaries of CEPH family segregation for copy number and multiallelic markers in the  $\beta$ -defensin cluster. Pages 3–28 show the segregation of all markers typed in pedigrees, with one page per family; the explanatory key to the symbols used is on the second page.

[Fig. S1 \(PDF\)](#)

[Dataset S1 \(XLS\)](#)
